# Supplementary material for: A synthesis of fuctionalized 2-amino-3-cyano pyrroles from terminal alkynes, sulfonyl azides and phenacylmalononitriles
Source: Royal Society of Chemistry journal article supplement (doi:10.1039/d2ob00277a), 2022-01-01
Supplement: d2ob00277a1.pdf [file d2ob00277a1.pdf]

*Supplementary Material*

**A synthesis of functionalized 2-amino-3-cyano pyrroles from  
terminal alkynes, sulfonyl azides and phenacylmalononitriles**

**Issa Yavari\*, Meysam Ghorbanzadeh and Somayeh Akbarzadeh**

Department of Chemistry, Tarbiat Modares University, PO Box 14115-175, Tehran, Iran

**Supplementary Material - Table of Contents**

|                                                                   |     |
|-------------------------------------------------------------------|-----|
| NMR spectra of 2-amino-3-cyano pyrroles <b>4</b> .....            | S2  |
| X-ray crystal-structure determination of compound <b>4l</b> ..... | S32 |

# NMR spectra of 2-amino-3-cyano pyrroles 4

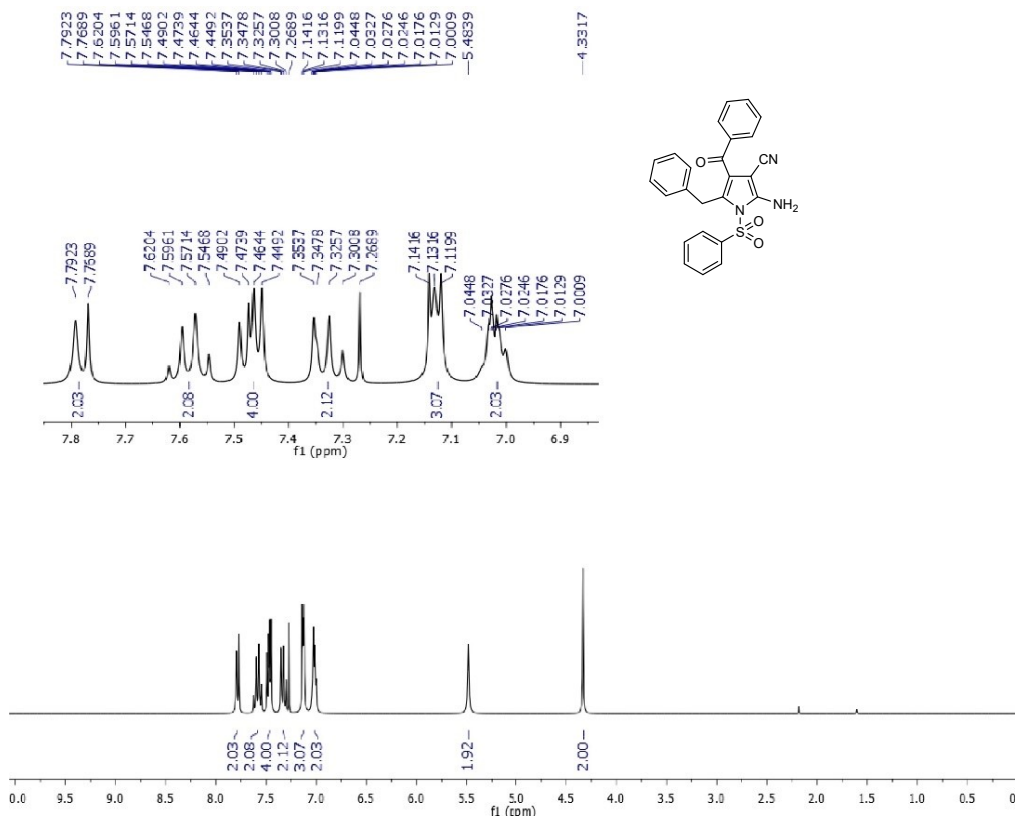

**<sup>1</sup>H NMR (300 MHz) of Compound 4a in CDCl<sub>3</sub>**

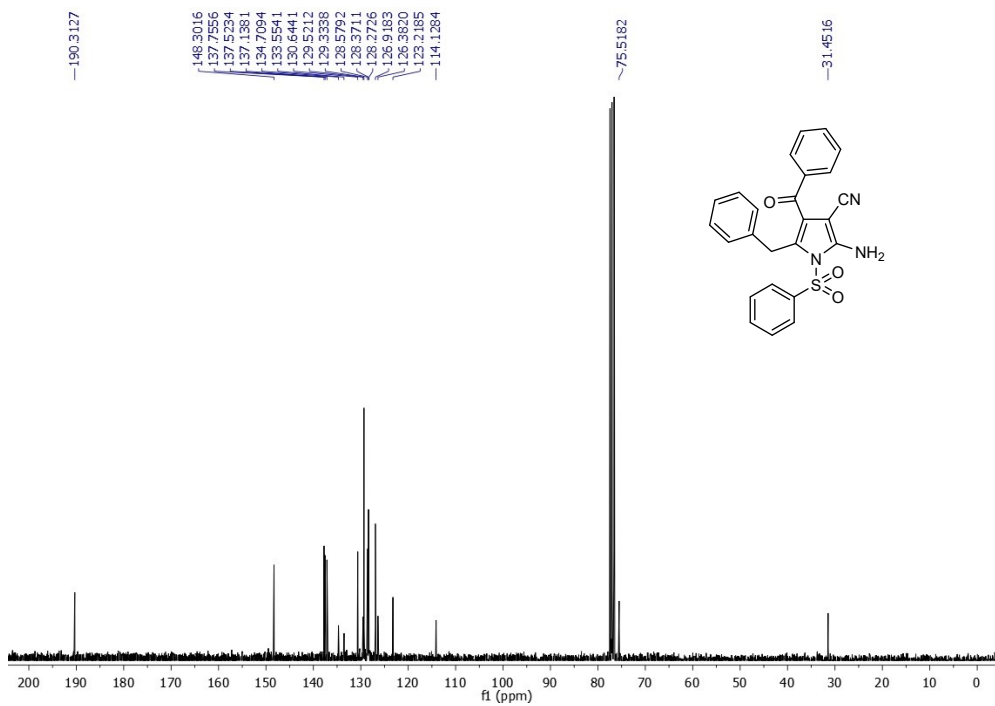

**<sup>13</sup>C NMR (75 MHz) of Compound 4a in CDCl<sub>3</sub>**

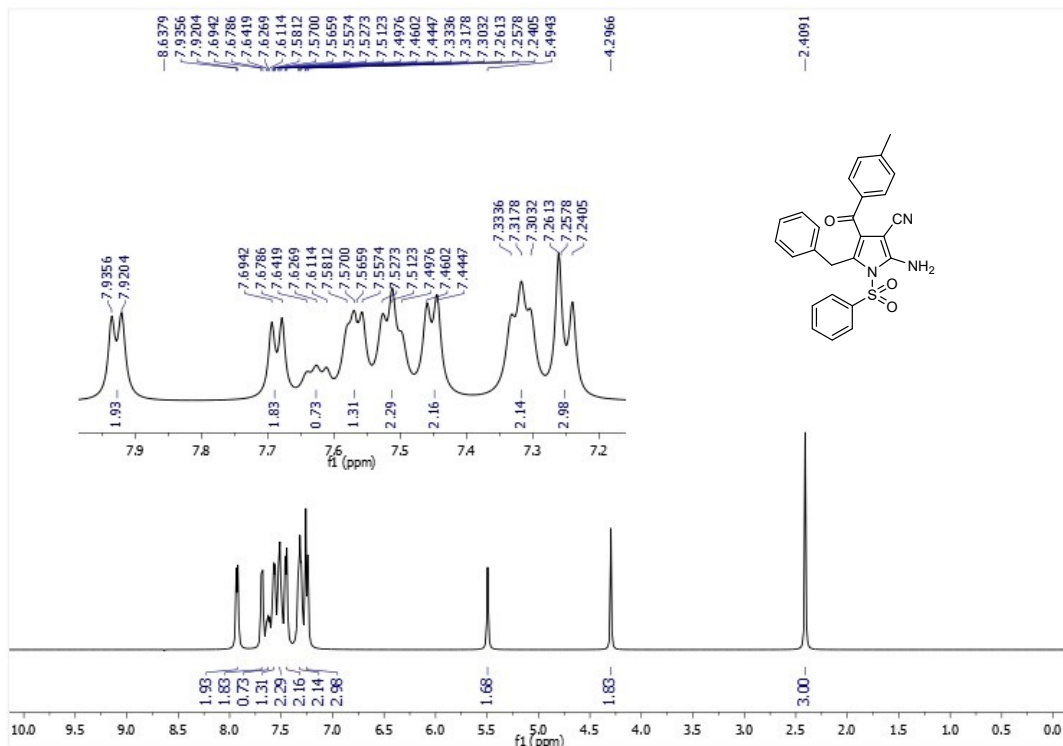

**<sup>1</sup>H NMR (500 MHz) of Compound 4b in CDCl<sub>3</sub>**

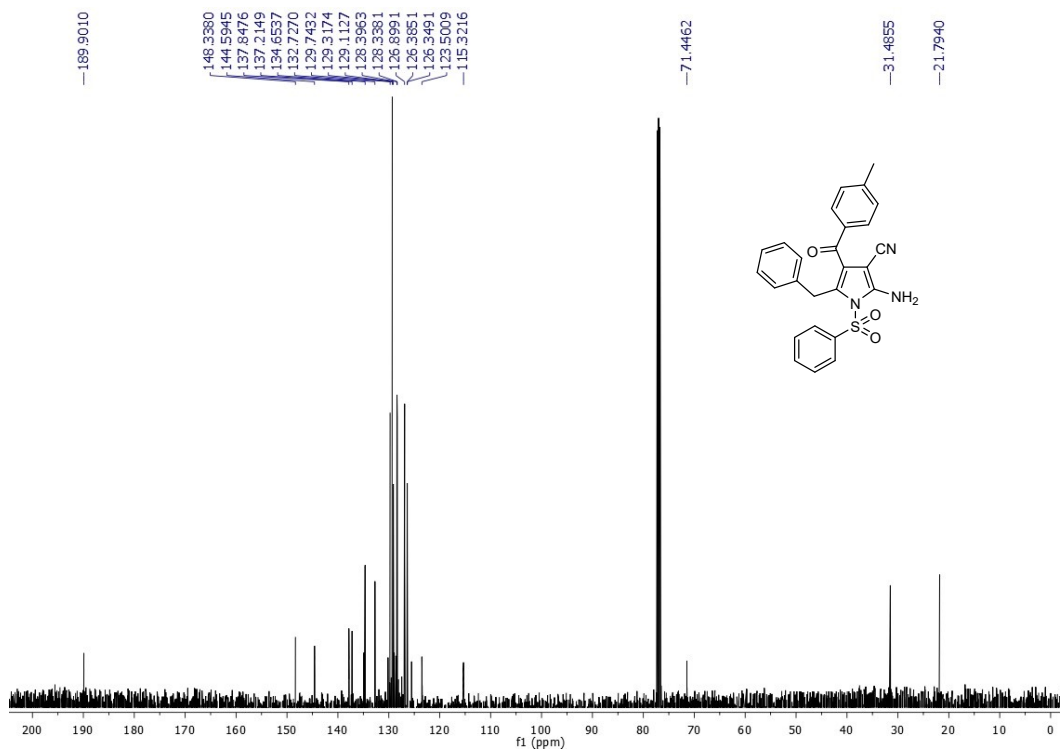

**<sup>13</sup>C NMR (126 MHz) of Compound 4b in CDCl<sub>3</sub>**

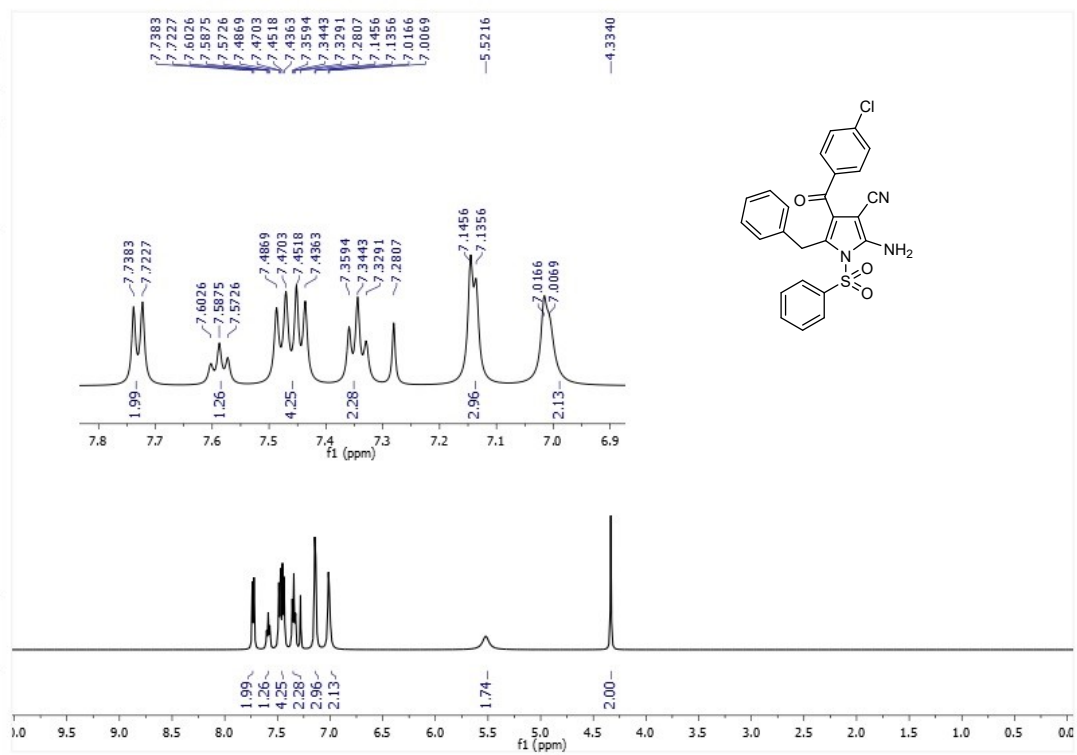

**<sup>1</sup>H NMR (500 MHz) of Compound 4c in CDCl<sub>3</sub>**

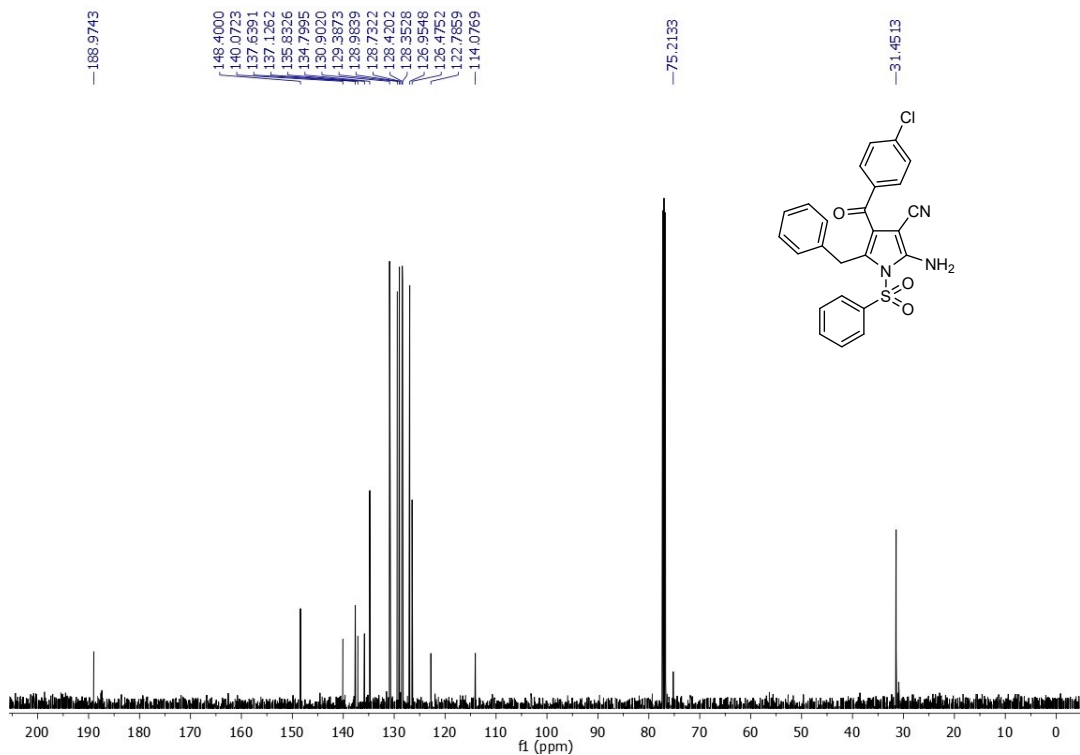

**<sup>13</sup>C NMR (126 MHz) of Compound 4c in CDCl<sub>3</sub>**

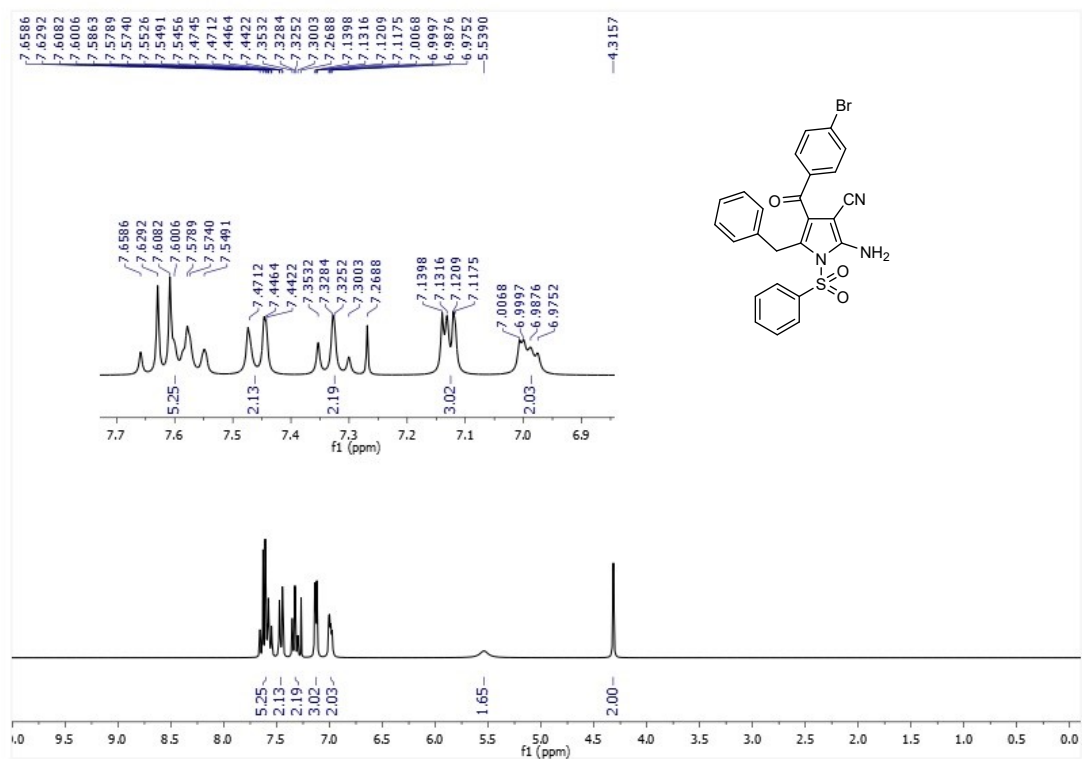

$^1\text{H}$  NMR (500 MHz) of Compound **4d** in  $\text{CDCl}_3$

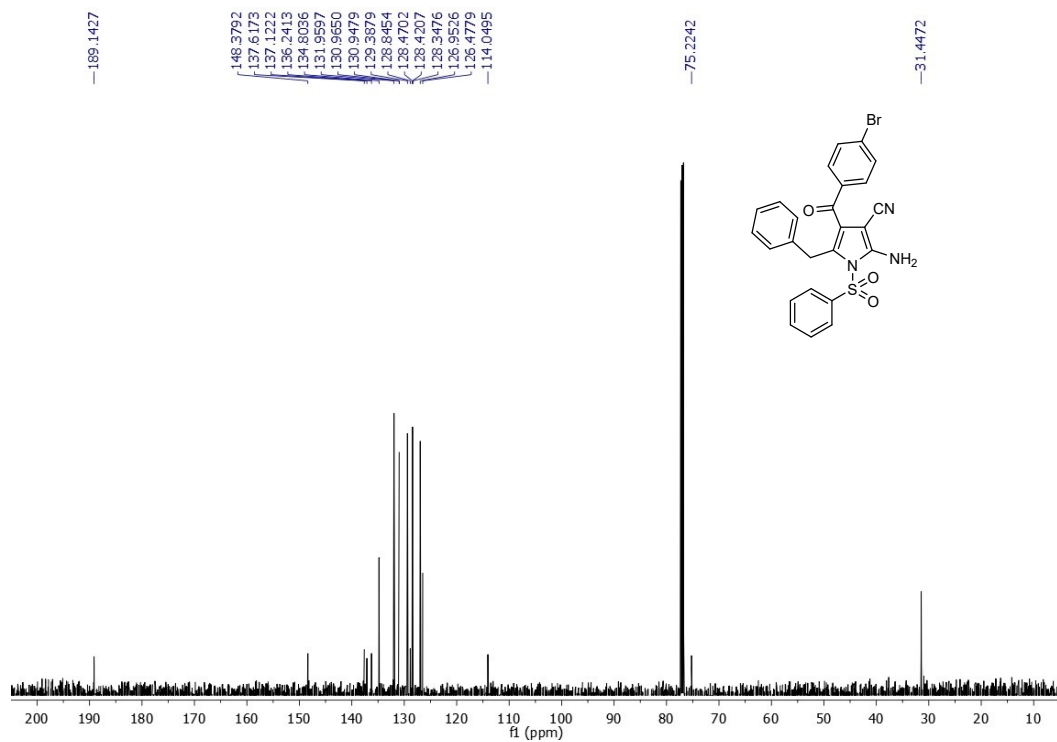

$^{13}\text{C}$  NMR (126 MHz) of Compound **4d** in  $\text{CDCl}_3$

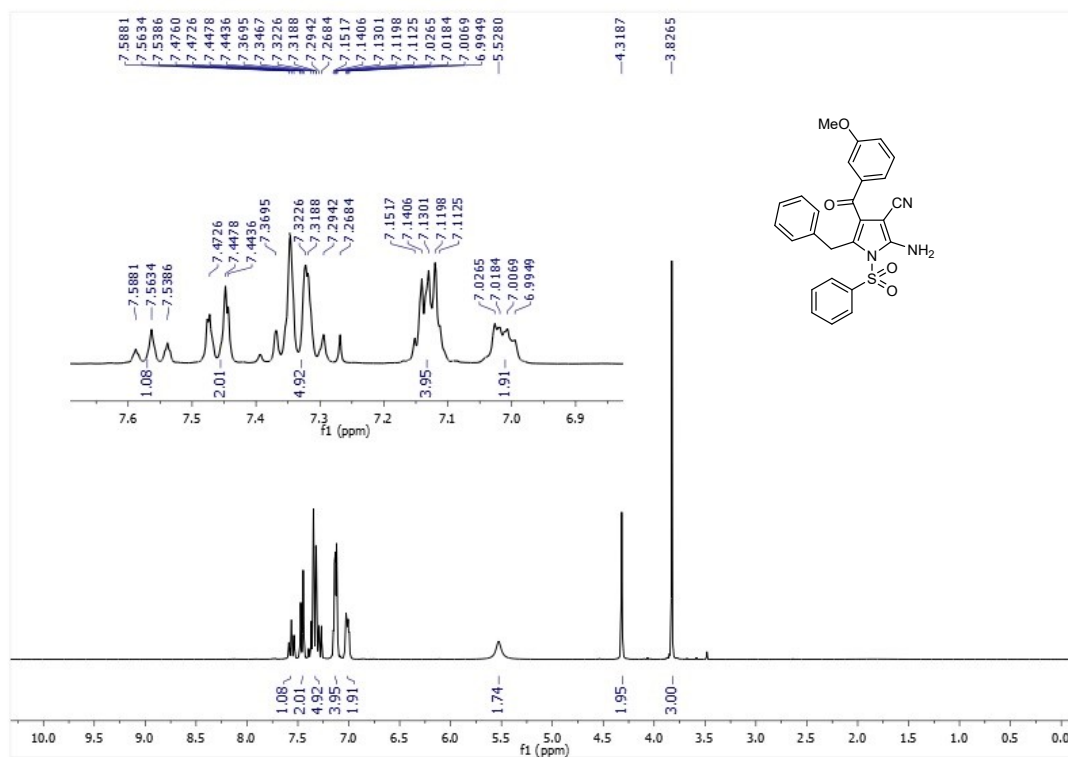

**<sup>1</sup>H NMR (300 MHz) of Compound 4e in CDCl<sub>3</sub>**

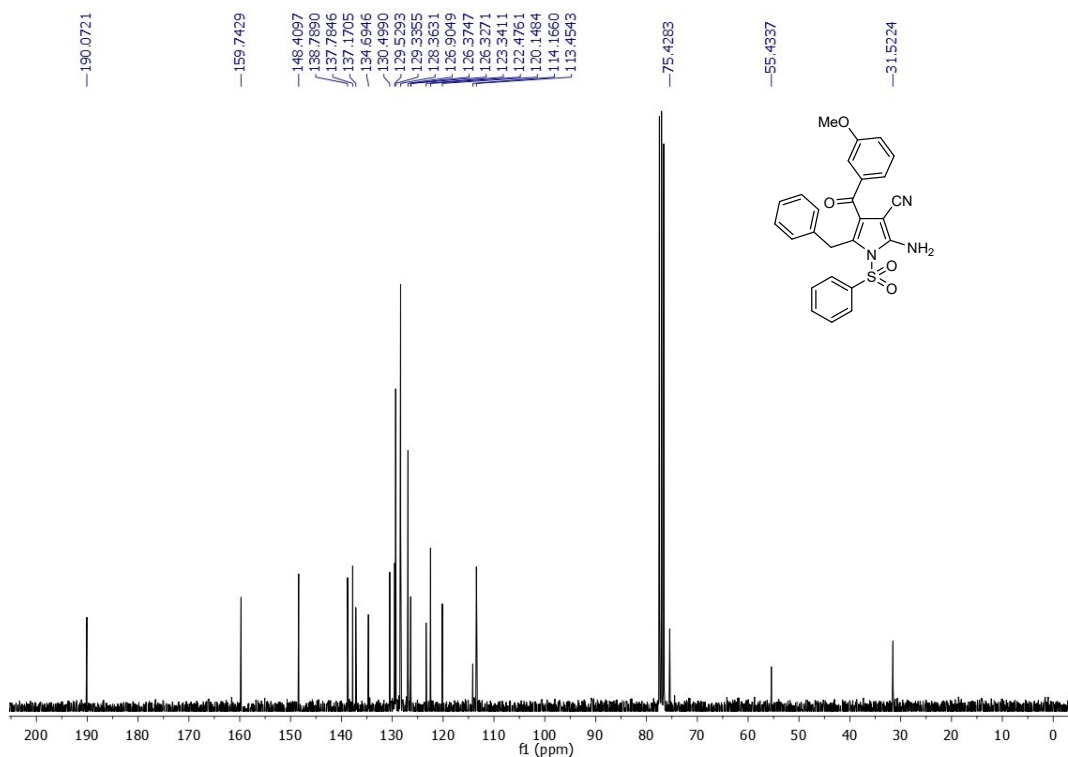

**<sup>13</sup>C NMR (75 MHz) of Compound 4e in CDCl<sub>3</sub>**

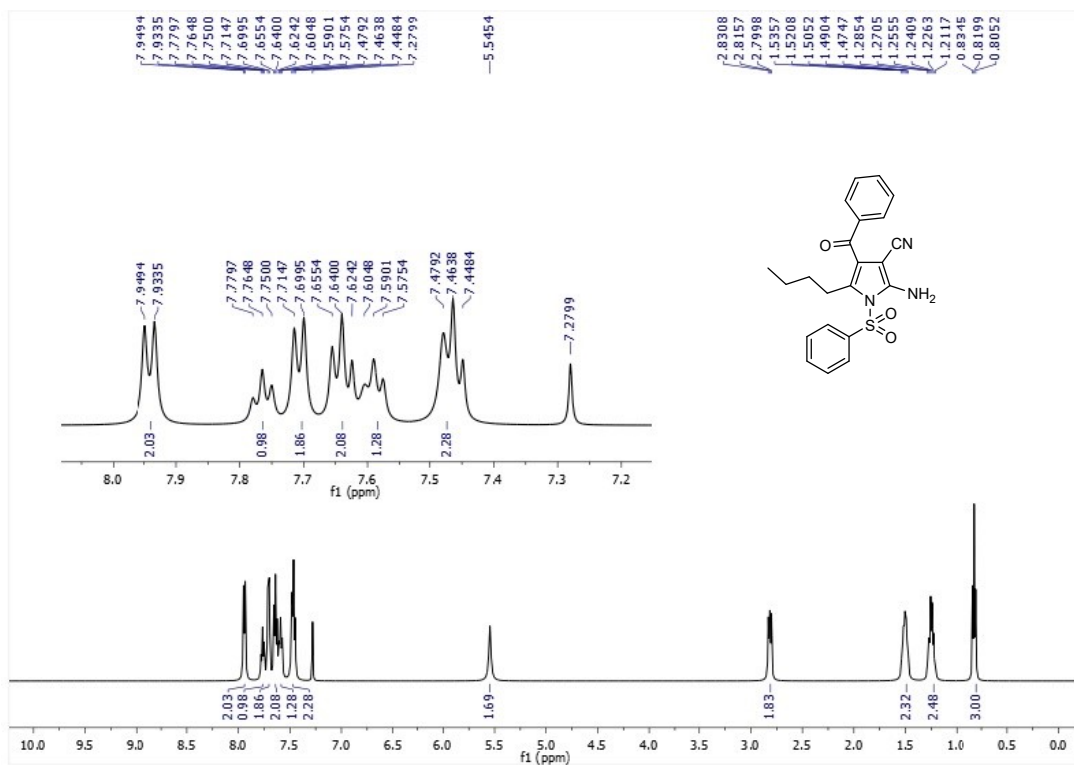

**<sup>1</sup>H NMR (500 MHz) of Compound 4f in CDCl<sub>3</sub>**

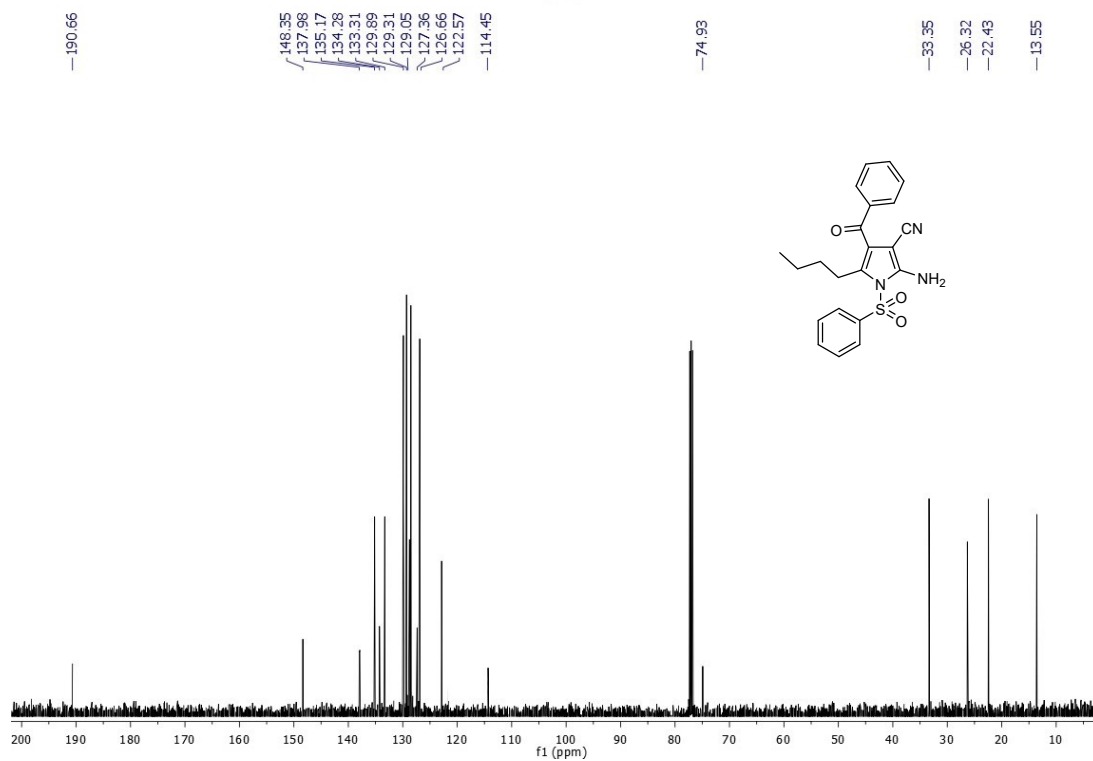

**<sup>13</sup>C NMR (126 MHz) of Compound 4f in CDCl<sub>3</sub>**

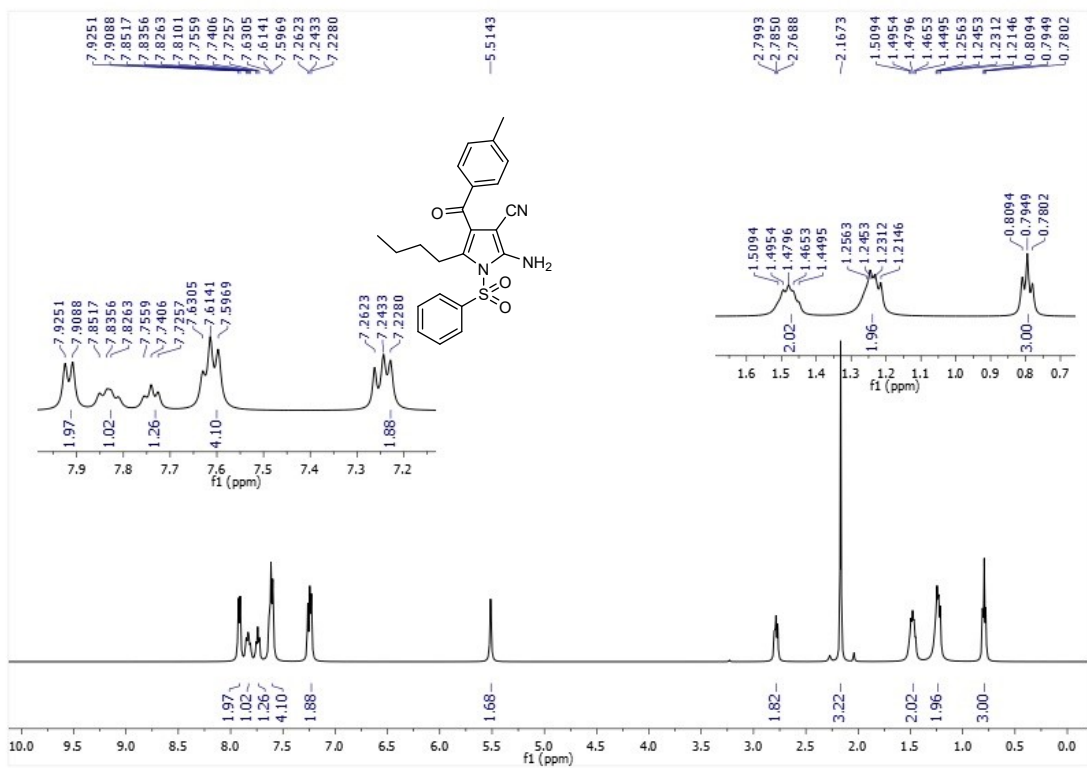

**<sup>1</sup>H NMR (500 MHz) of Compound 4g in CDCl<sub>3</sub>**

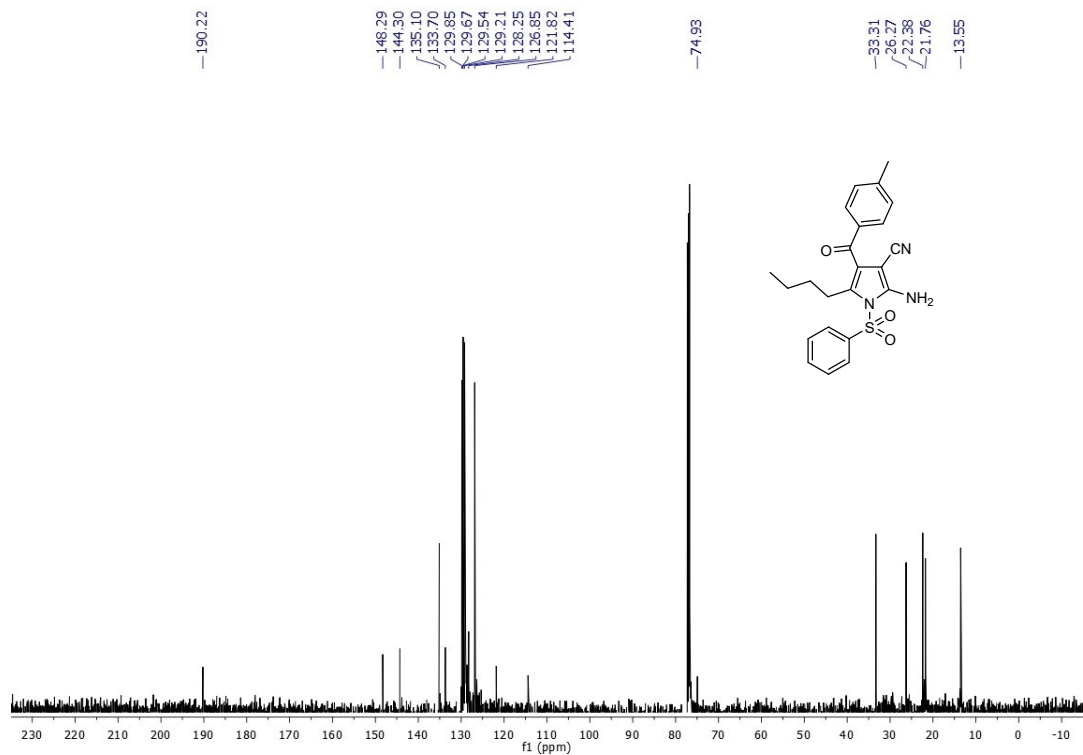

**<sup>13</sup>C NMR (126 MHz) of Compound 4g in CDCl<sub>3</sub>**



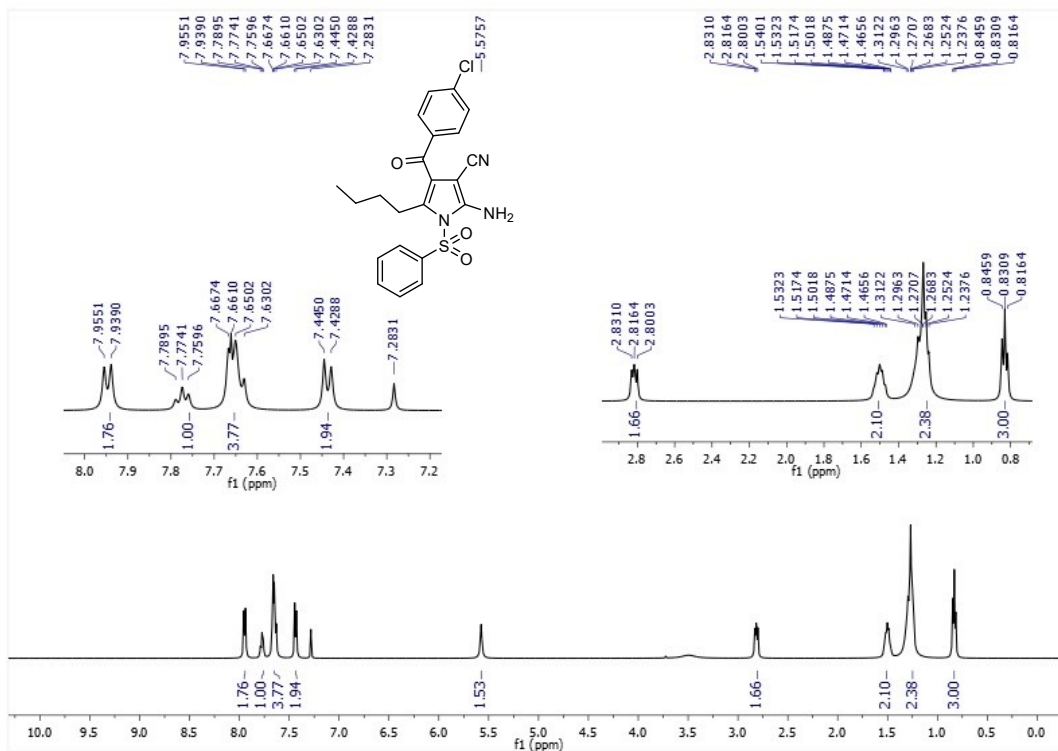

**<sup>1</sup>H NMR (500 MHz) of Compound 4h in CDCl<sub>3</sub>**

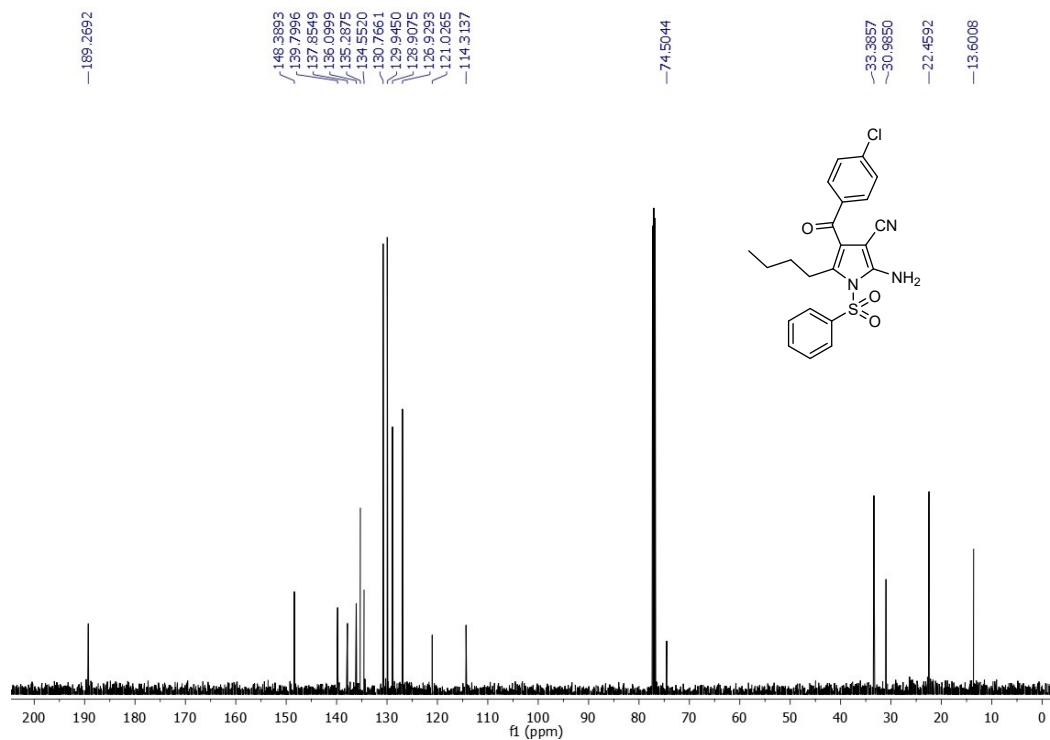

**<sup>13</sup>C NMR (126 MHz) of Compound 4h in CDCl<sub>3</sub>**

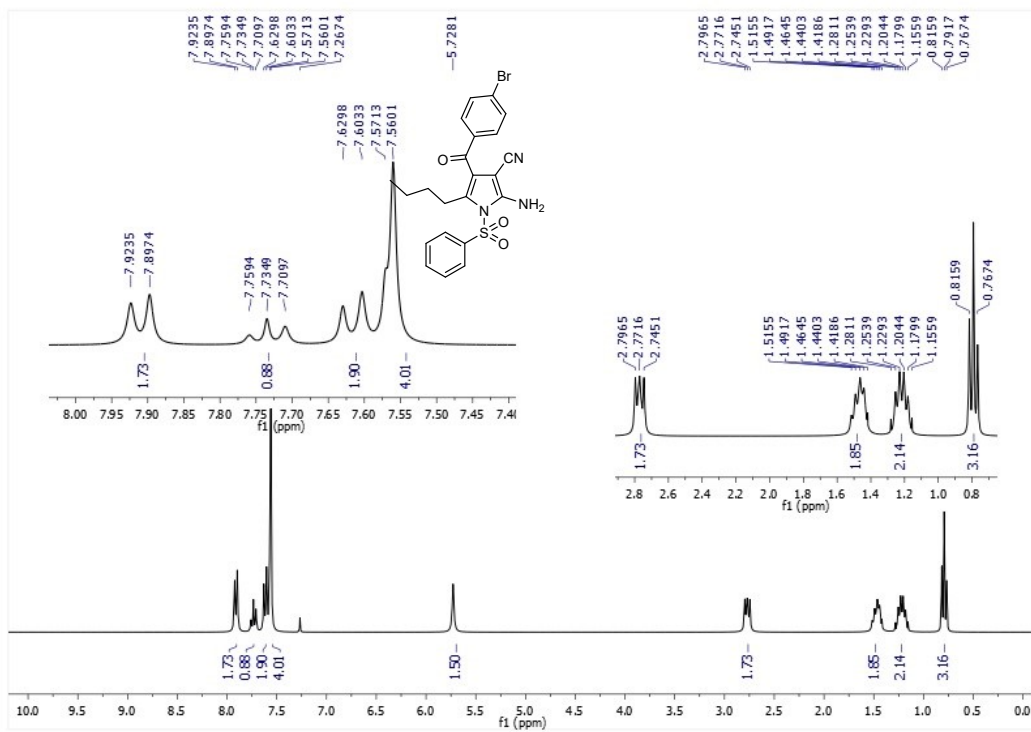

**<sup>1</sup>H NMR (300 MHz) of Compound 4i in CDCl<sub>3</sub>**

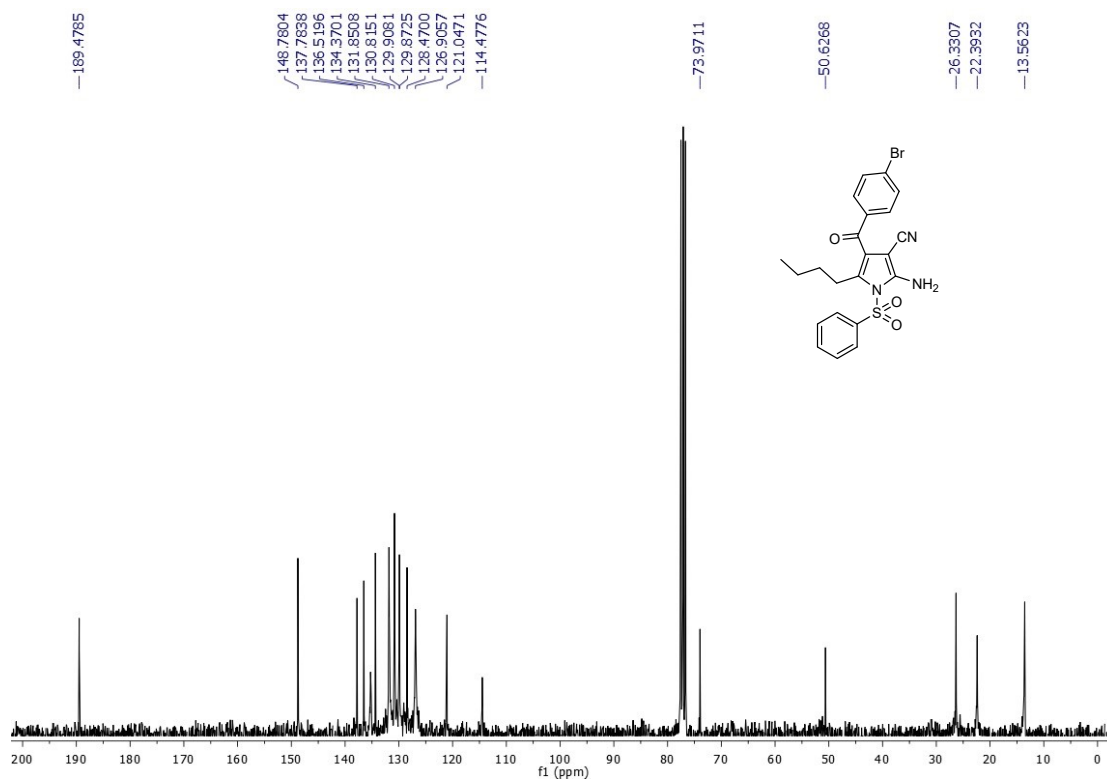

**<sup>13</sup>C NMR (75 MHz) of Compound 4i in CDCl<sub>3</sub>**

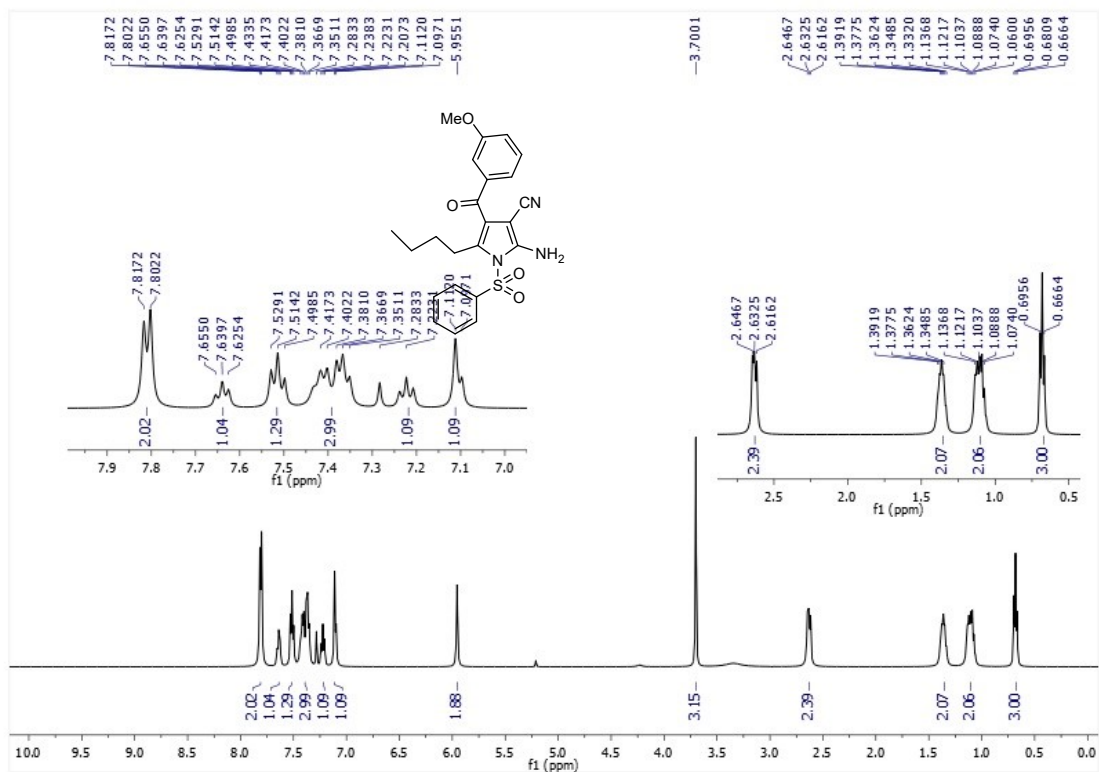

**<sup>1</sup>H NMR (500 MHz) of Compound 4j in CDCl<sub>3</sub>**

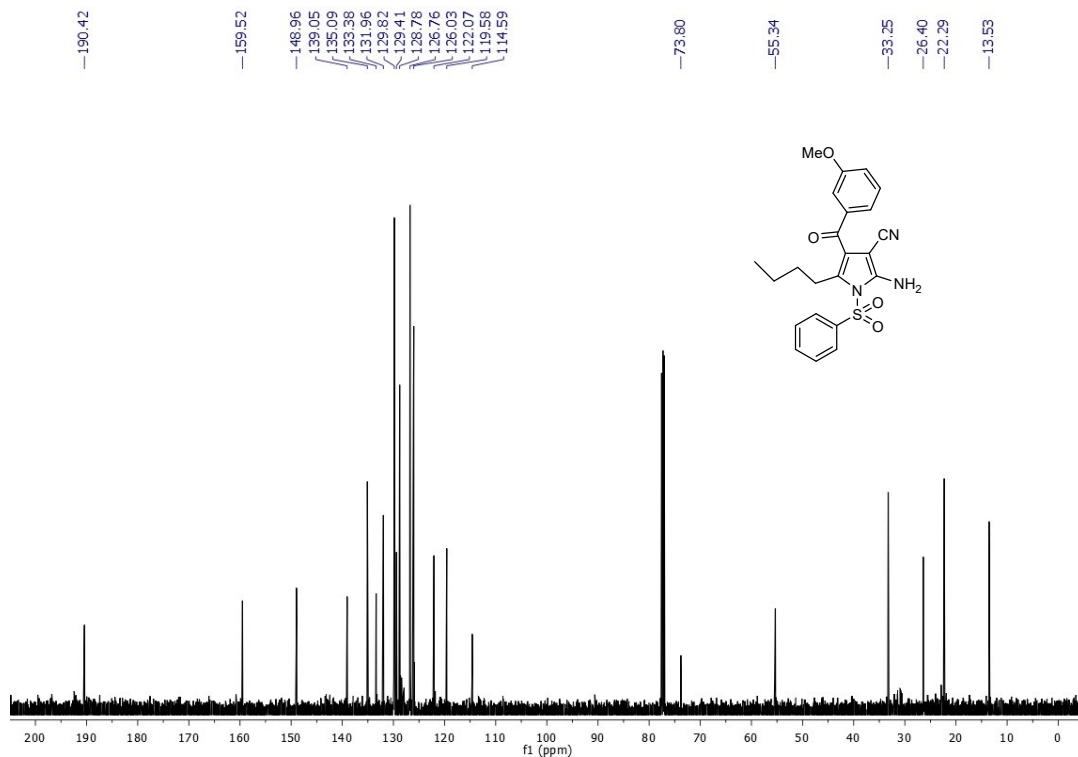

**<sup>13</sup>C NMR (126 MHz) of Compound 4j in CDCl<sub>3</sub>**

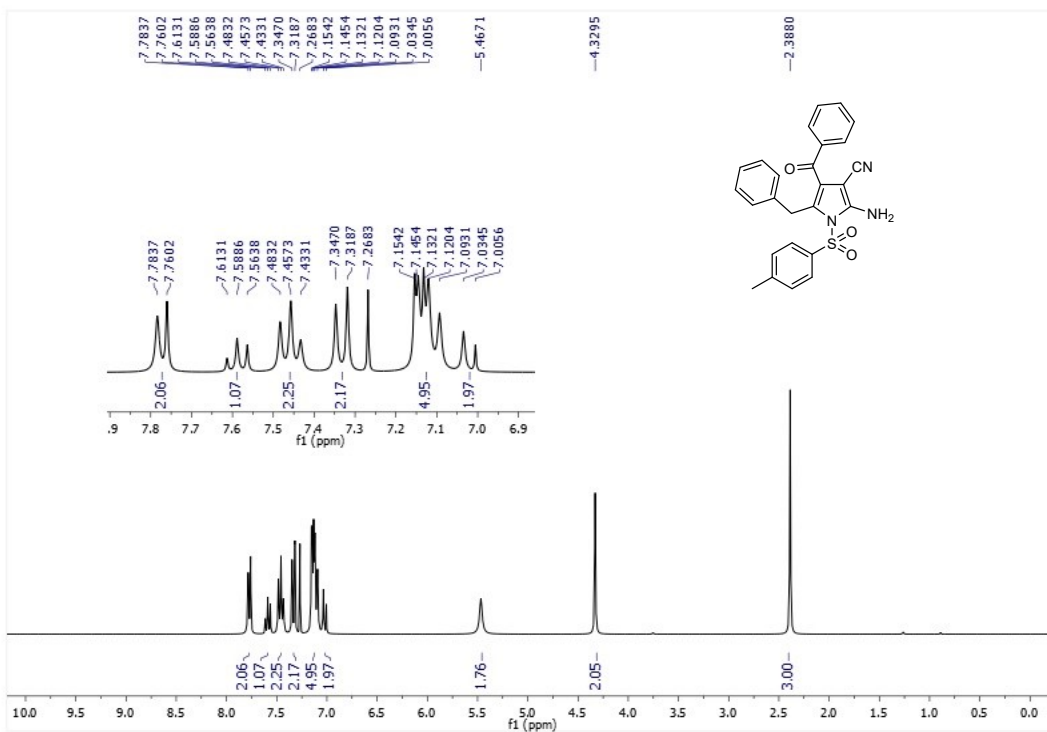

**<sup>1</sup>H NMR (300 MHz) of Compound 4k in CDCl<sub>3</sub>**

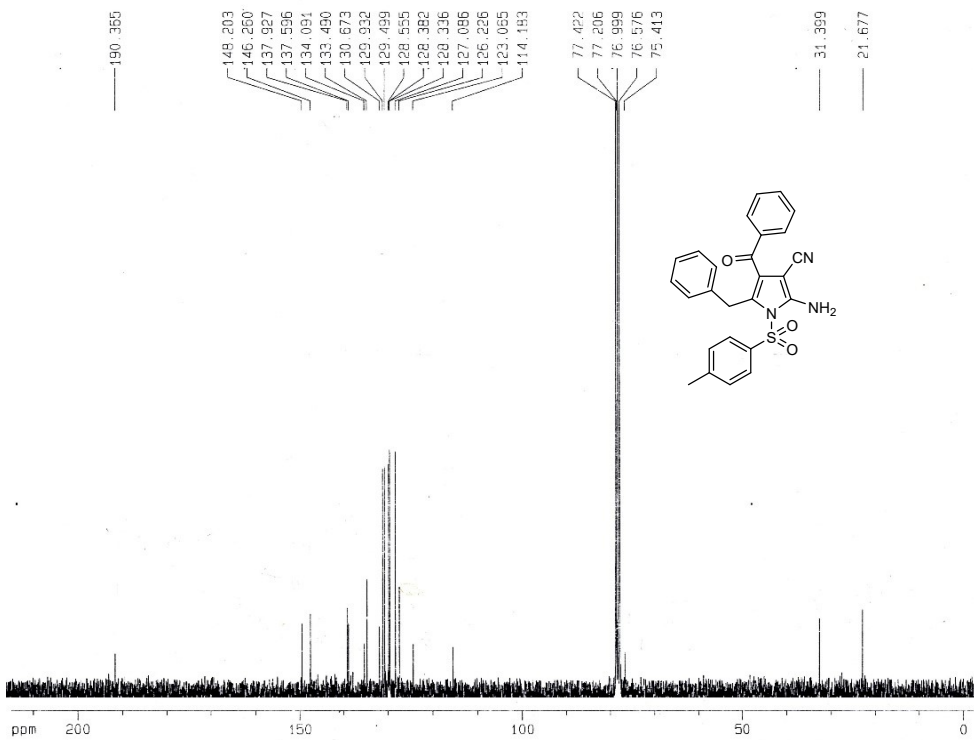

**<sup>13</sup>C NMR (75 MHz) of Compound 4k in CDCl<sub>3</sub>**

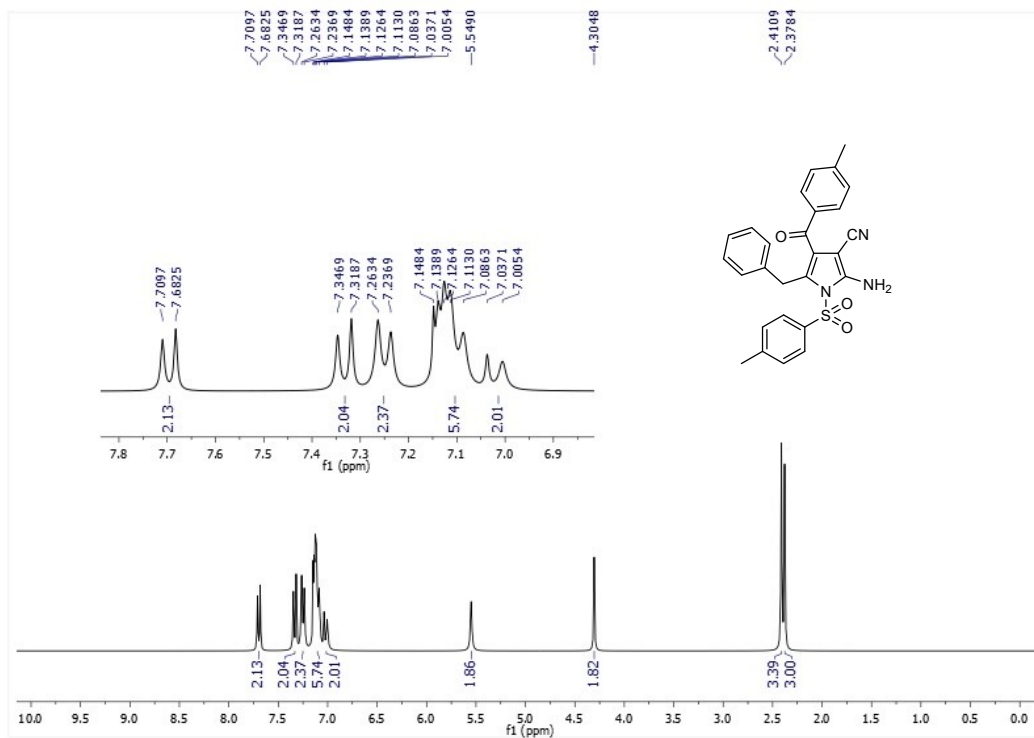

**<sup>1</sup>H NMR (300 MHz) of Compound 4I in CDCl<sub>3</sub>**

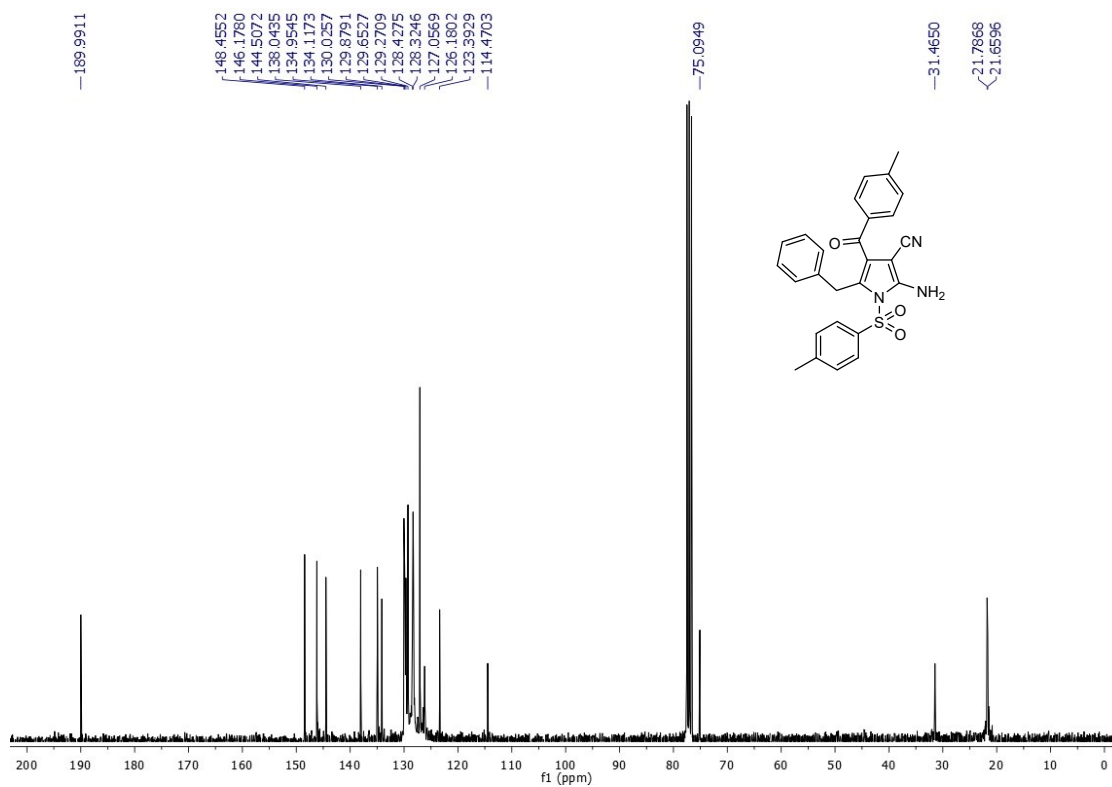

**<sup>13</sup>C NMR (75 MHz) of Compound 4I in CDCl<sub>3</sub>**

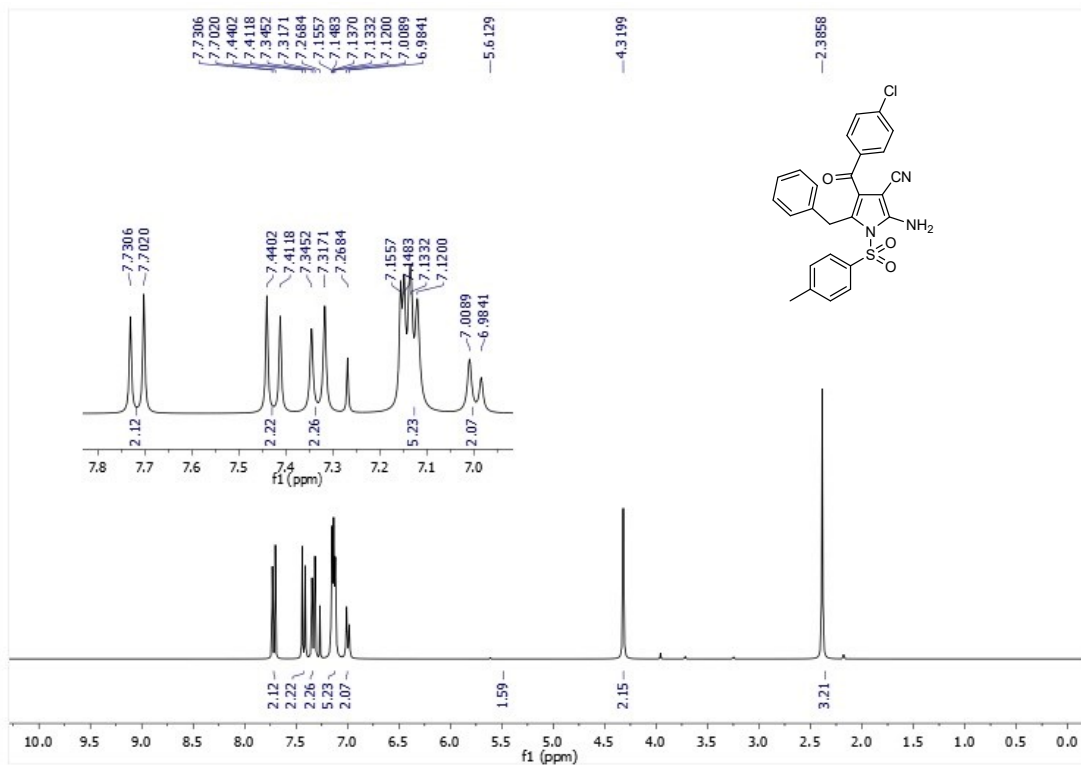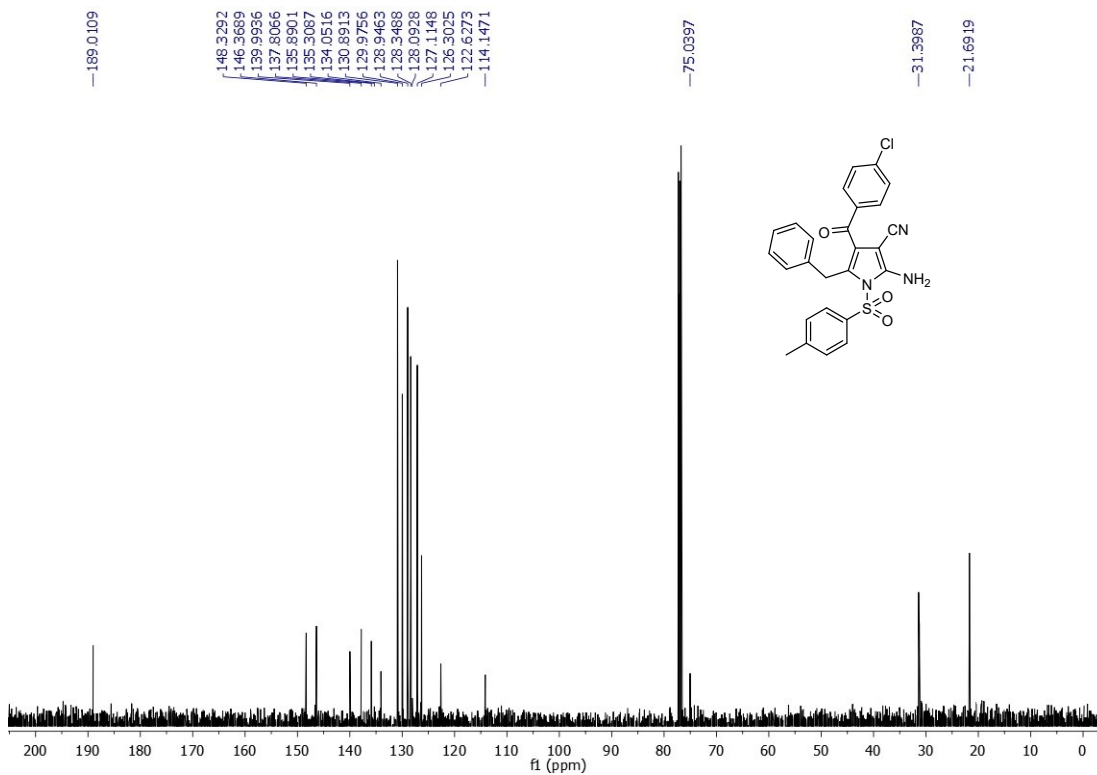

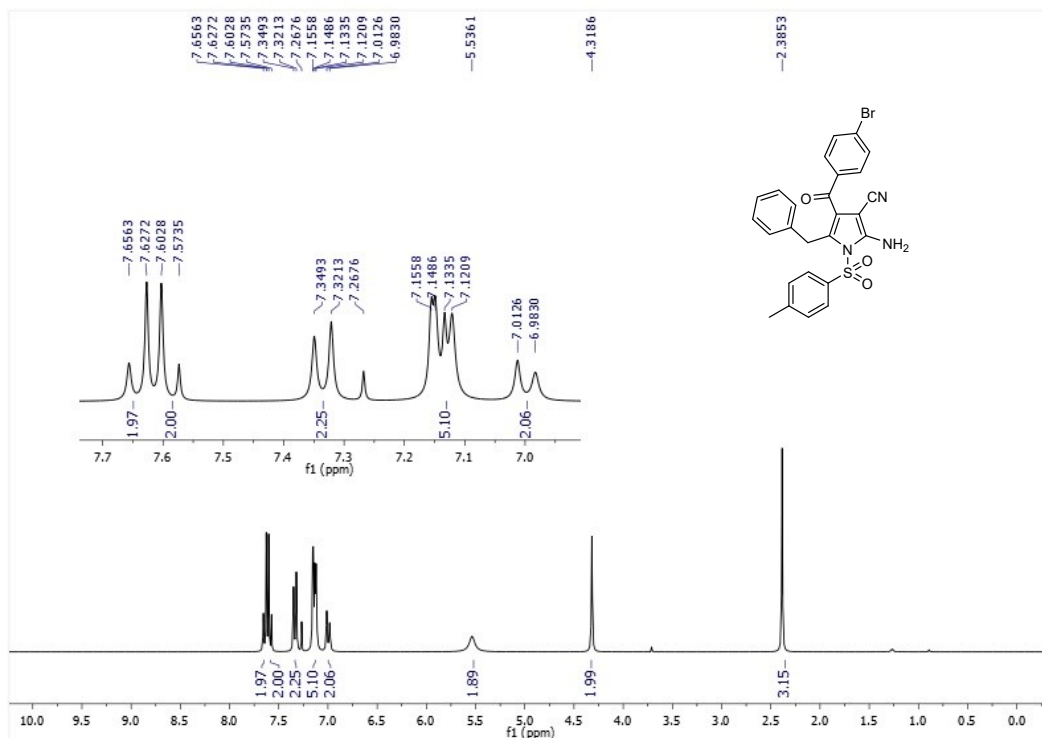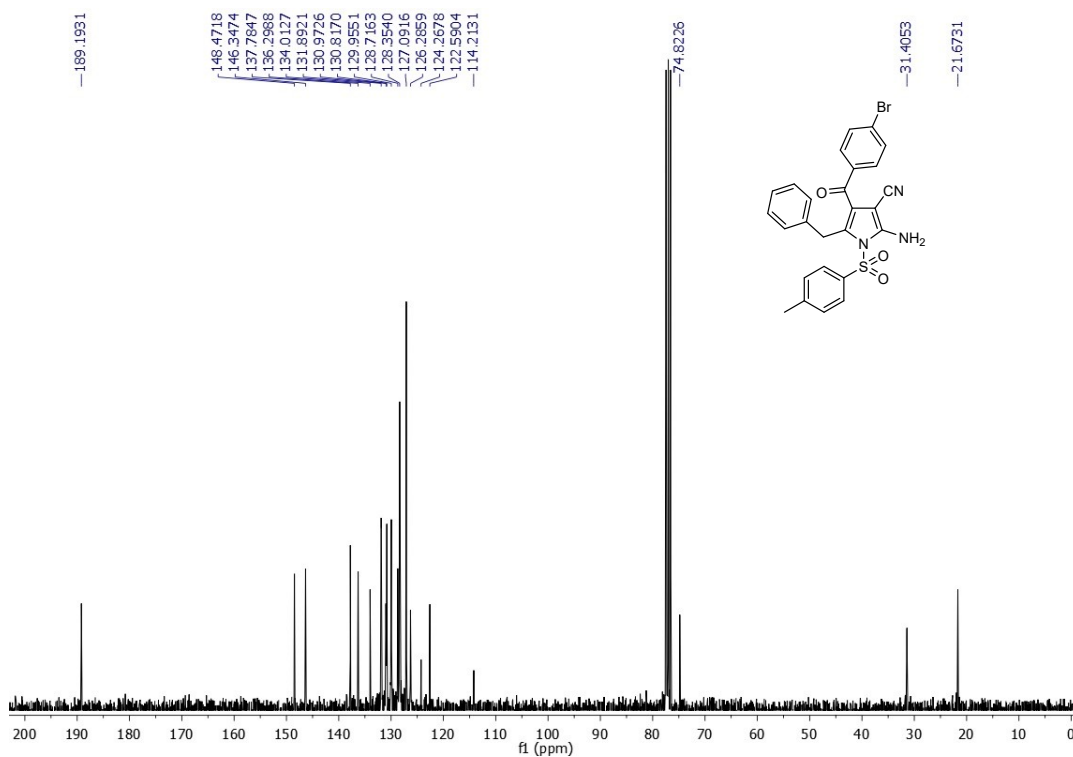

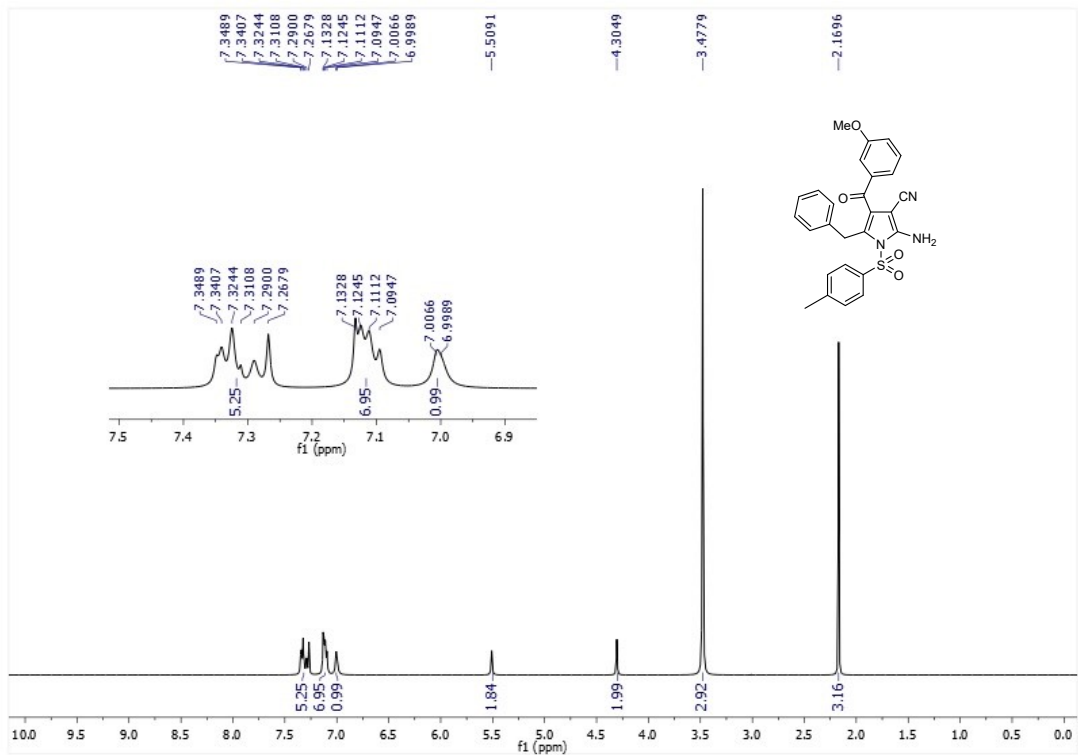

<sup>1</sup>H NMR (500 MHz) of Compound **40** in CDCl<sub>3</sub>

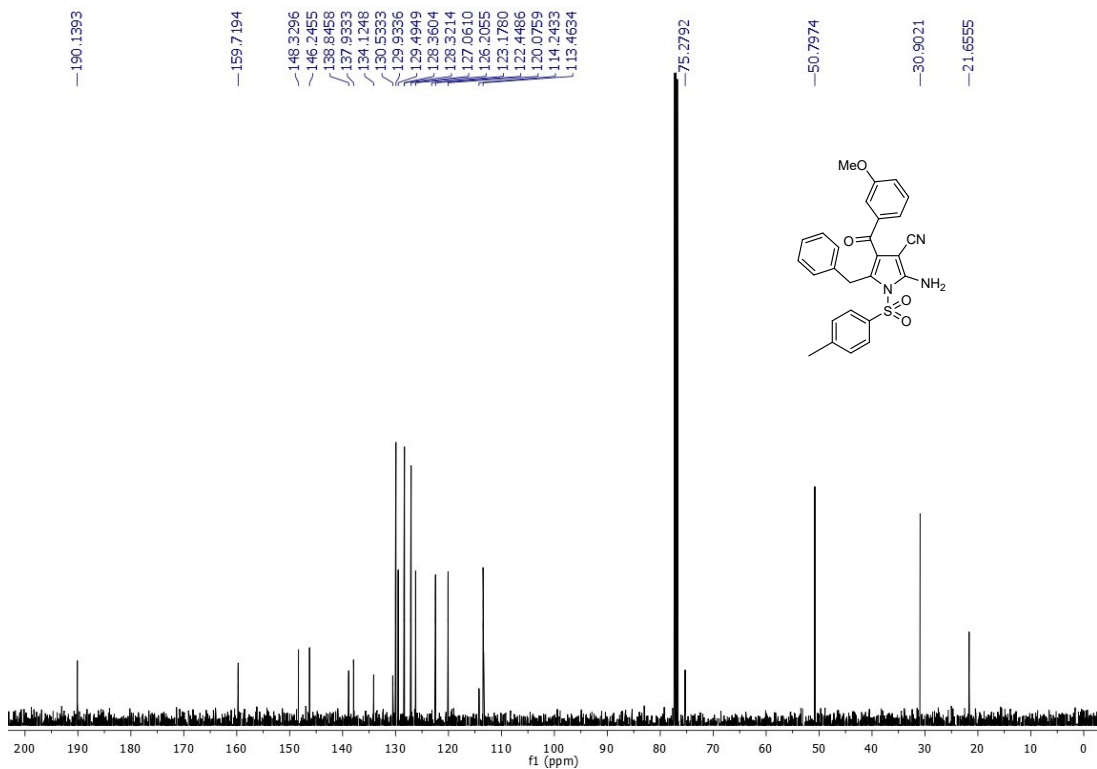

<sup>13</sup>C NMR (126 MHz) of Compound **40** in CDCl<sub>3</sub>



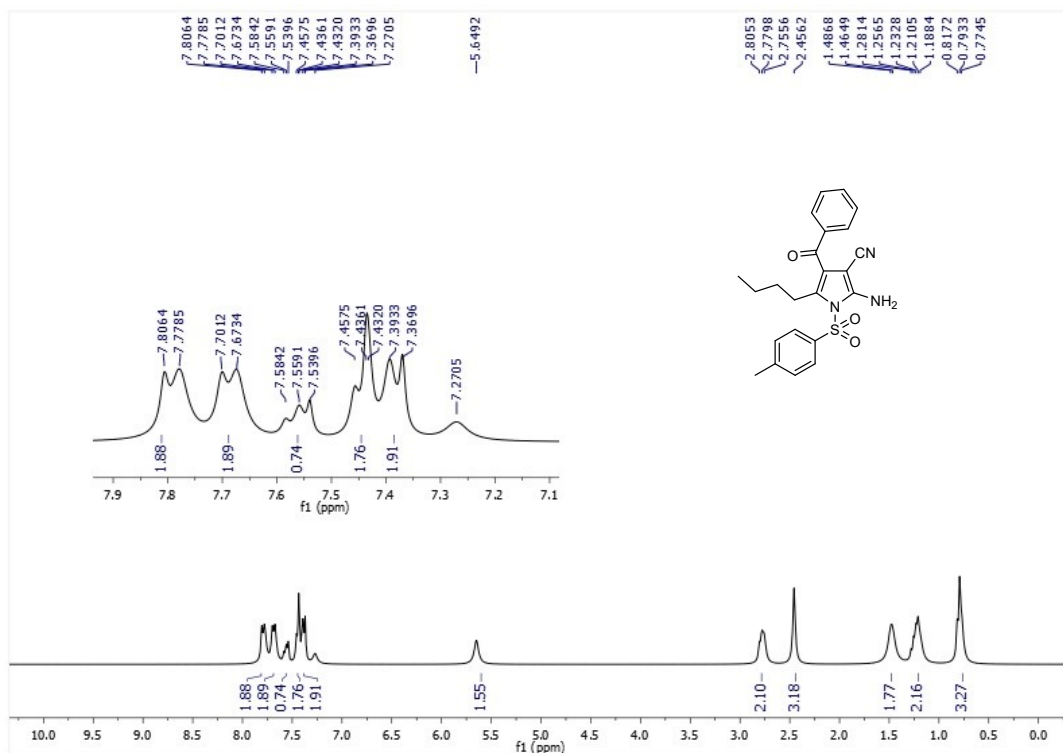

**<sup>1</sup>H NMR (300 MHz) of Compound 4p in CDCl<sub>3</sub>**

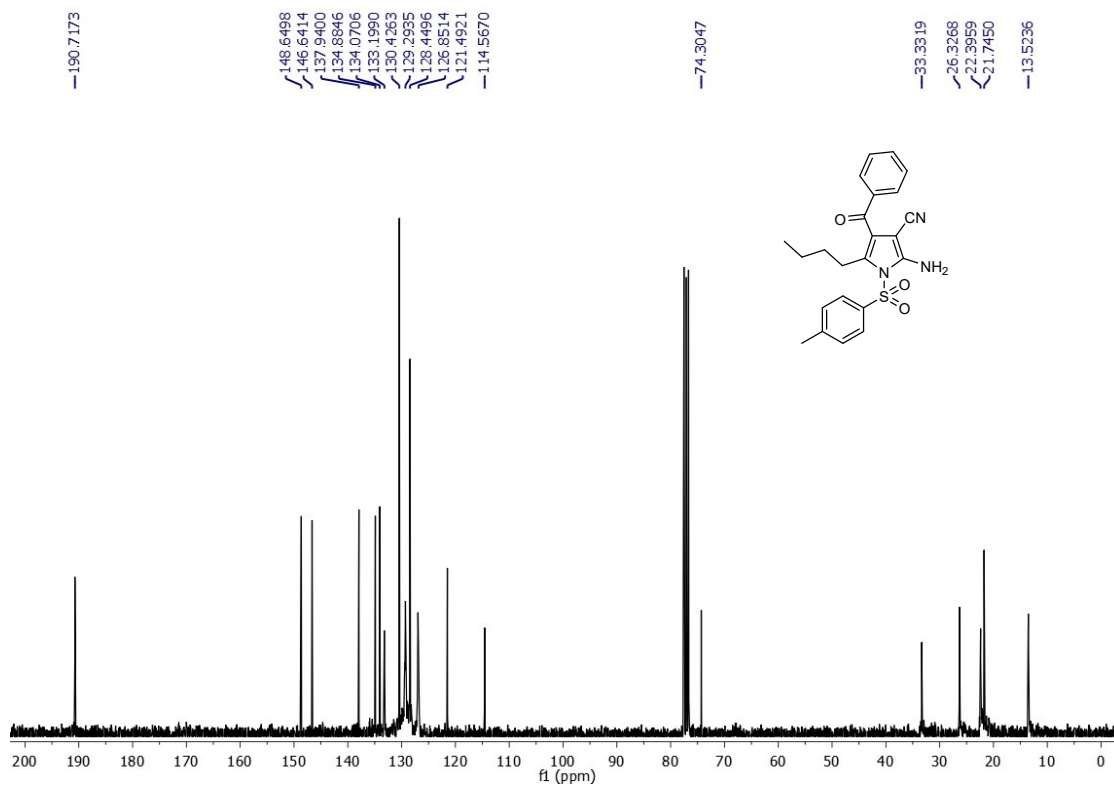

**<sup>13</sup>C NMR (75 MHz) of Compound 4p in CDCl<sub>3</sub>**

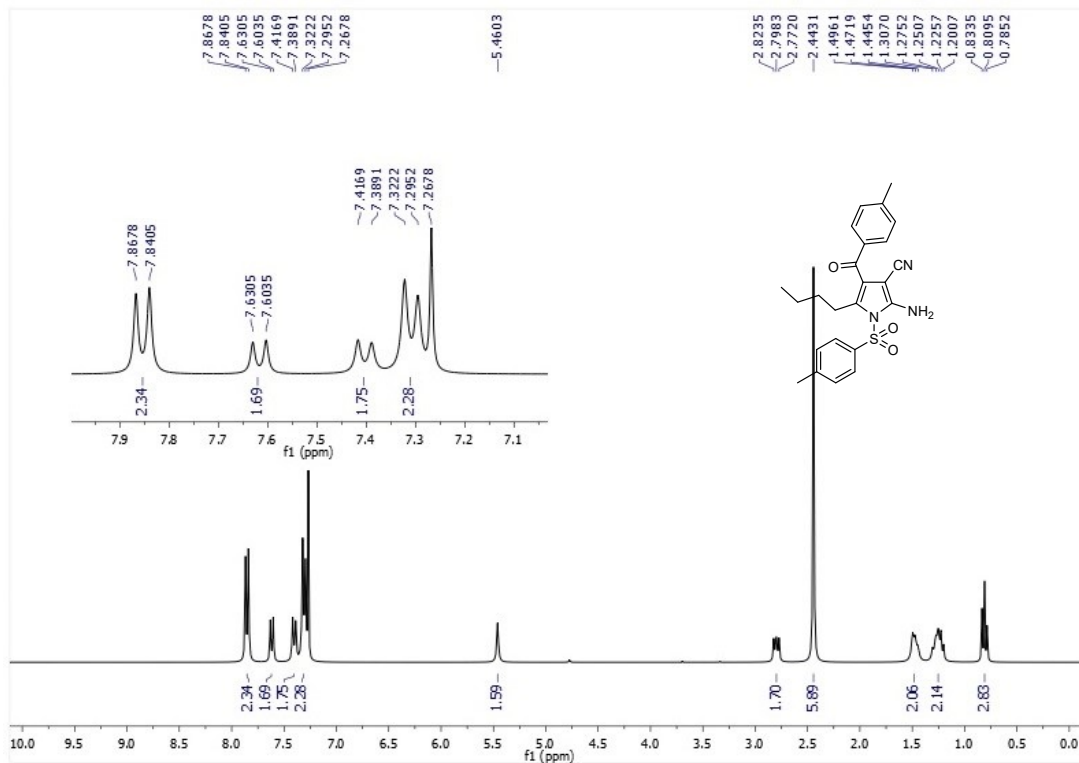

**<sup>1</sup>H NMR (300 MHz) of Compound 4q in CDCl<sub>3</sub>**

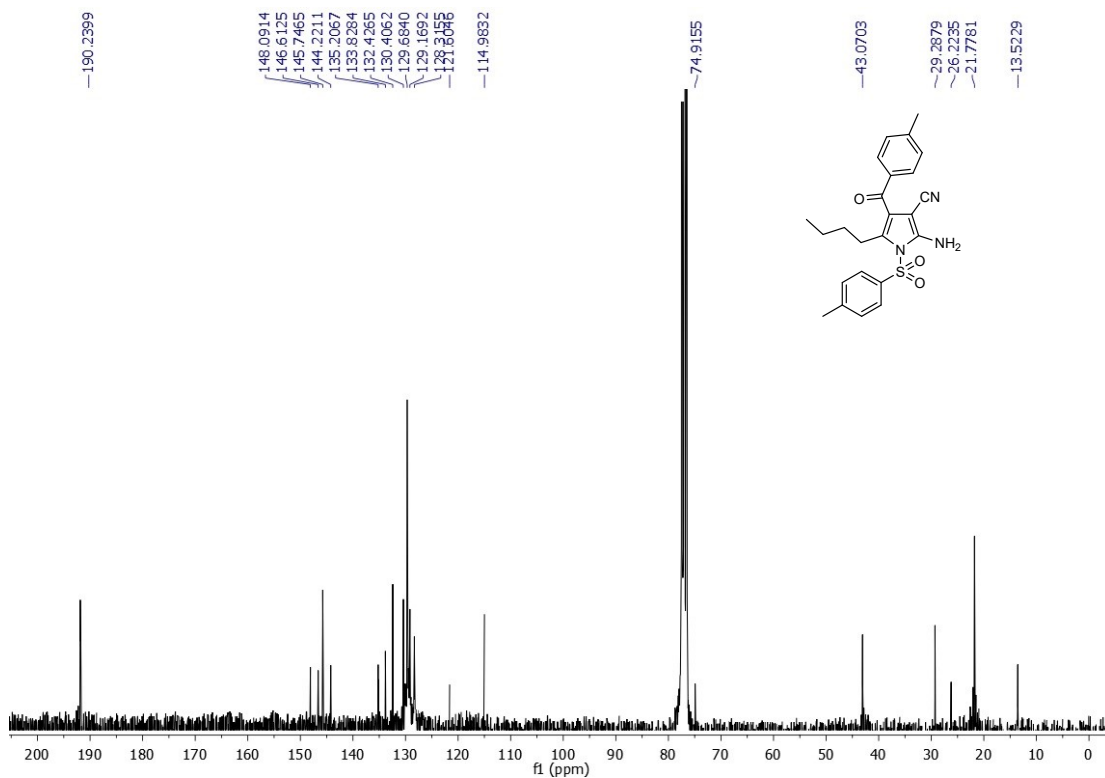

**<sup>13</sup>C NMR (75 MHz) of Compound 4q in CDCl<sub>3</sub>**

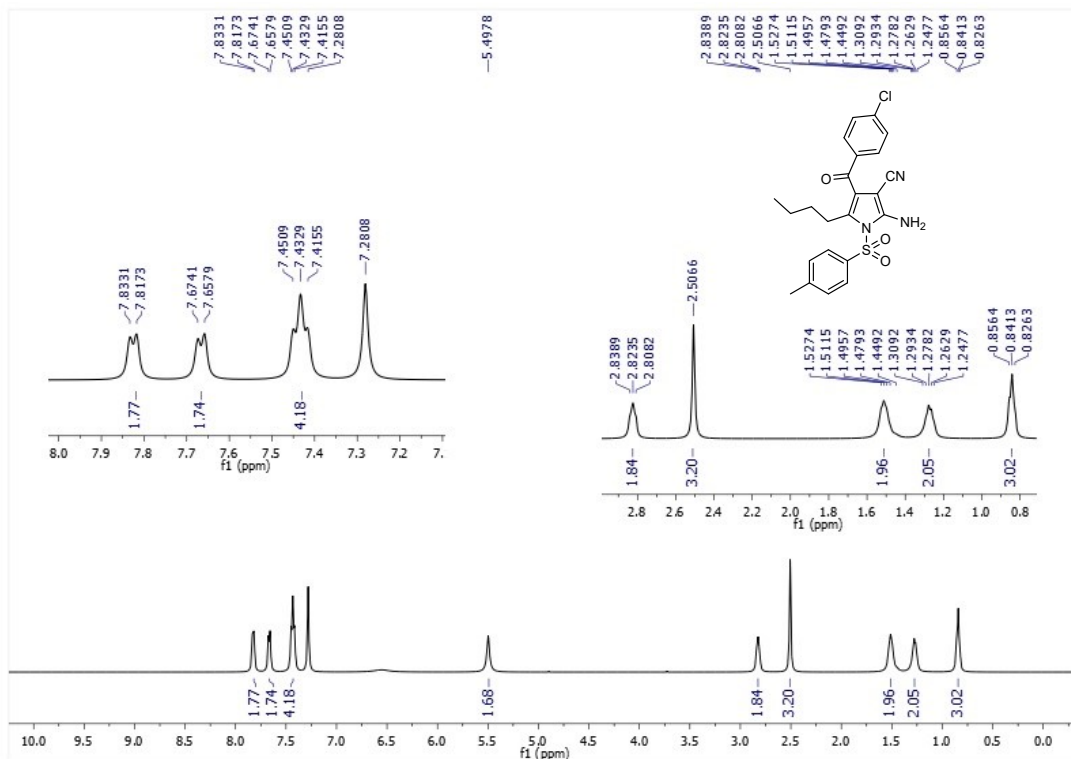

**<sup>1</sup>H NMR (500 MHz) of Compound 4r in CDCl<sub>3</sub>**

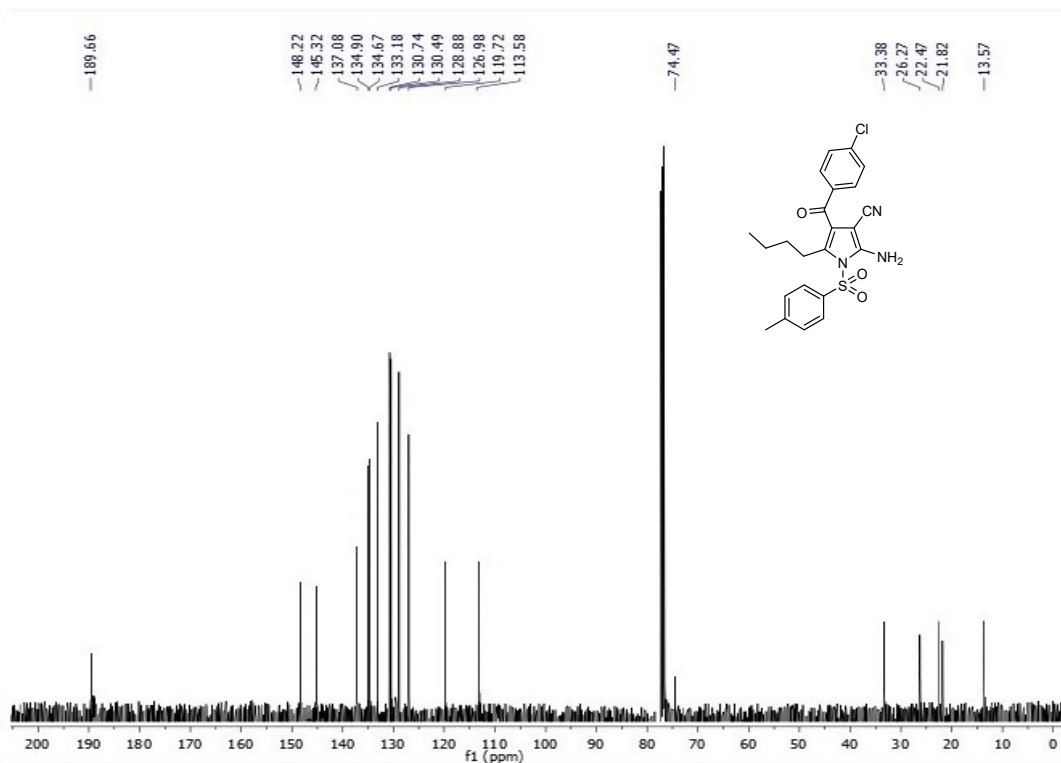

**<sup>13</sup>C NMR (126 MHz) of Compound 4r in CDCl<sub>3</sub>**

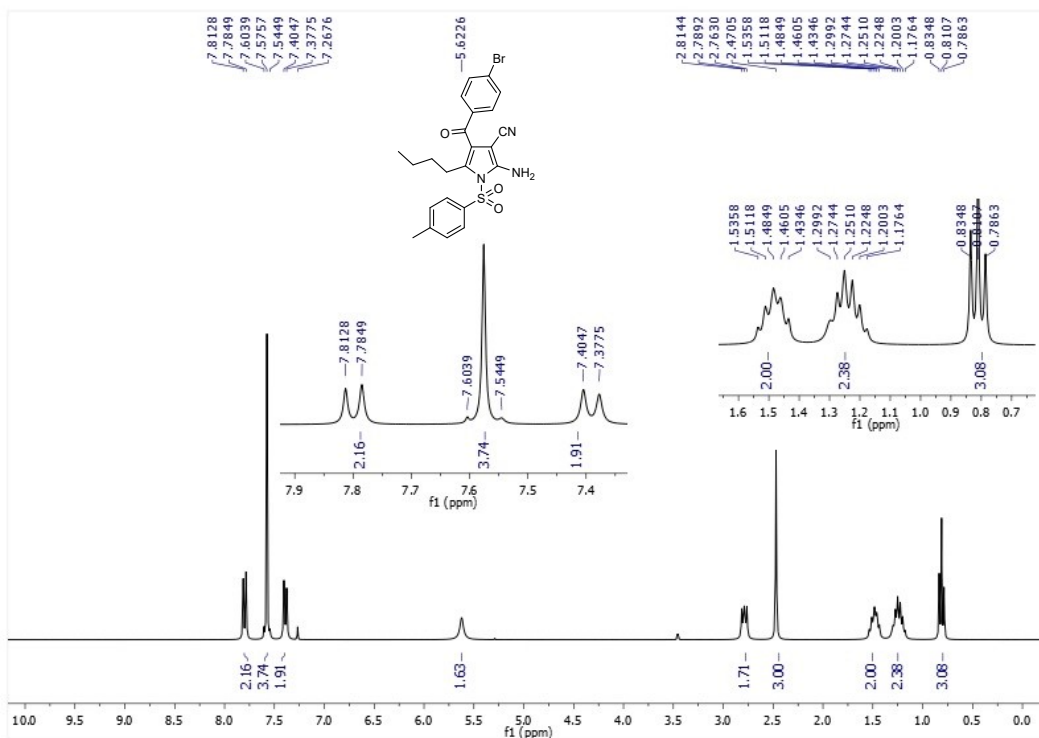

**<sup>1</sup>H NMR (300 MHz) of Compound 4s in CDCl<sub>3</sub>**

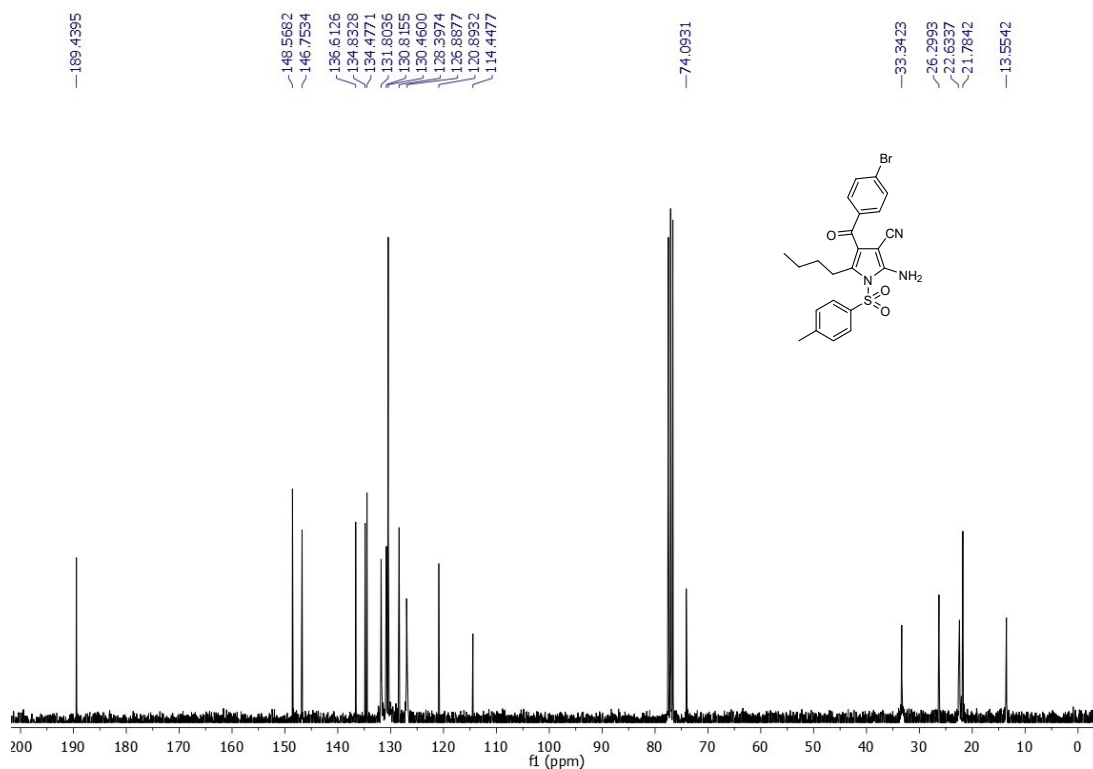

**<sup>13</sup>C NMR (75 MHz) of Compound 4s in CDCl<sub>3</sub>**

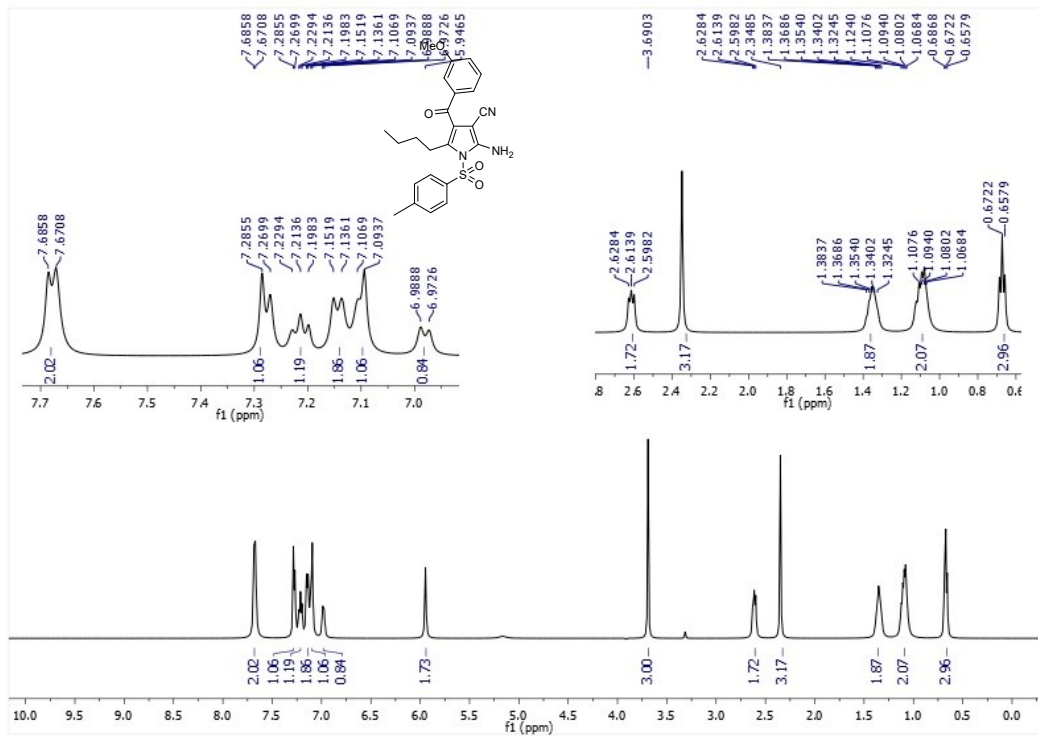

**<sup>1</sup>H NMR (500 MHz) of Compound 4t in CDCl<sub>3</sub>**

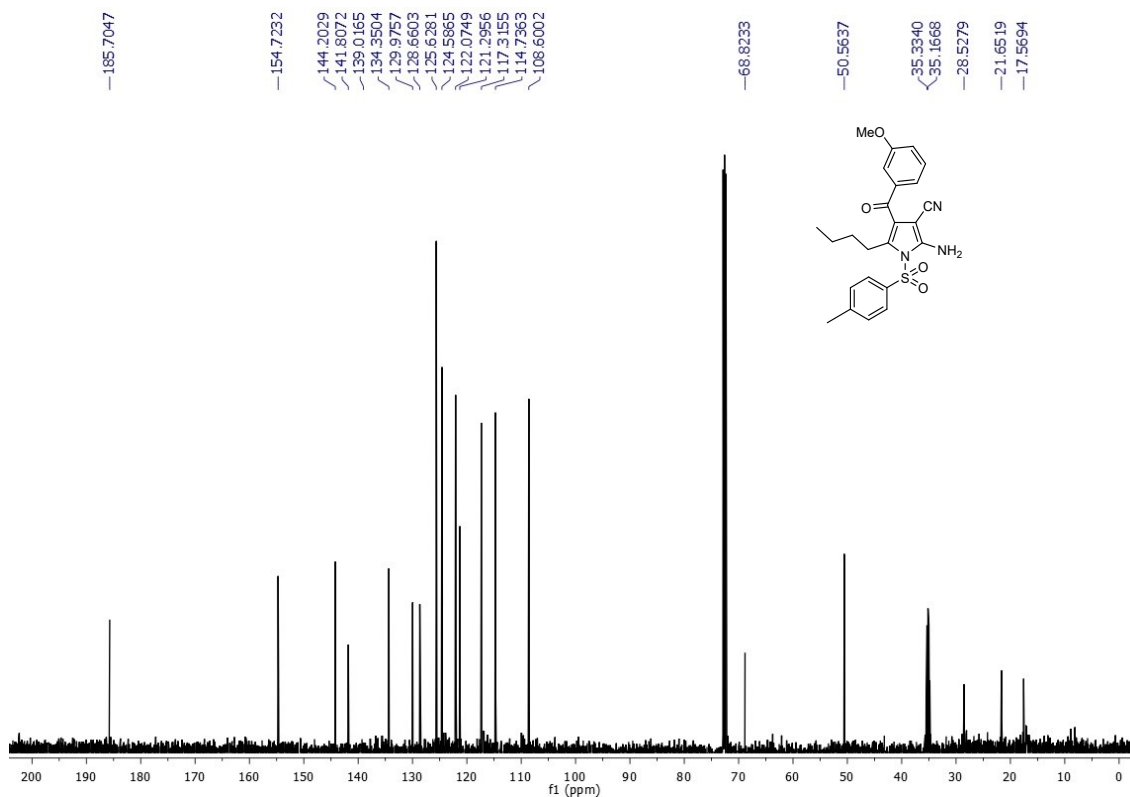

**<sup>13</sup>C NMR (126 MHz) of Compound 4t in CDCl<sub>3</sub>**

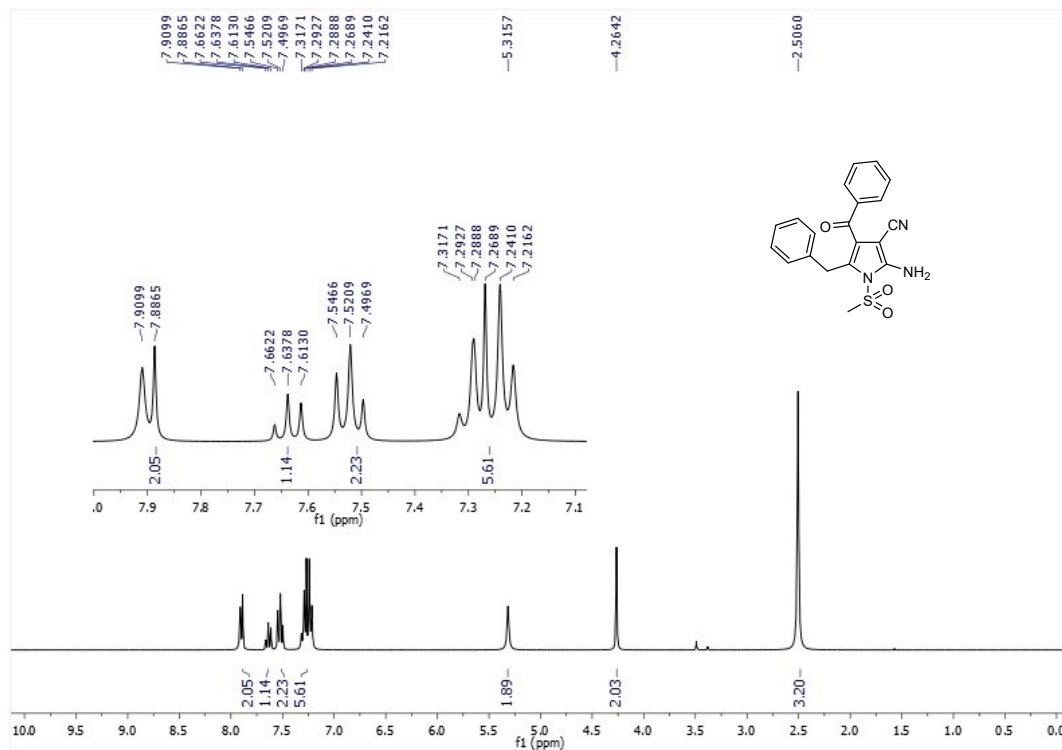

**<sup>1</sup>H NMR (300 MHz) of Compound **4u** in CDCl<sub>3</sub>**

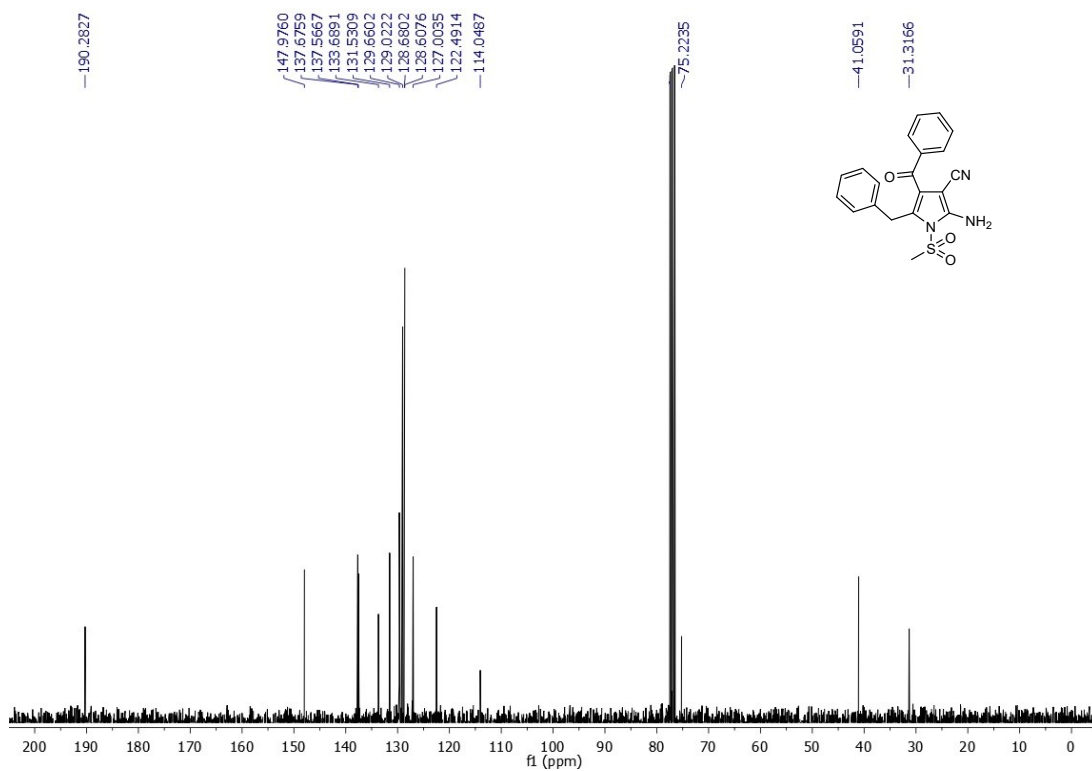

**<sup>13</sup>C NMR (75 MHz) of Compound **4u** in CDCl<sub>3</sub>**

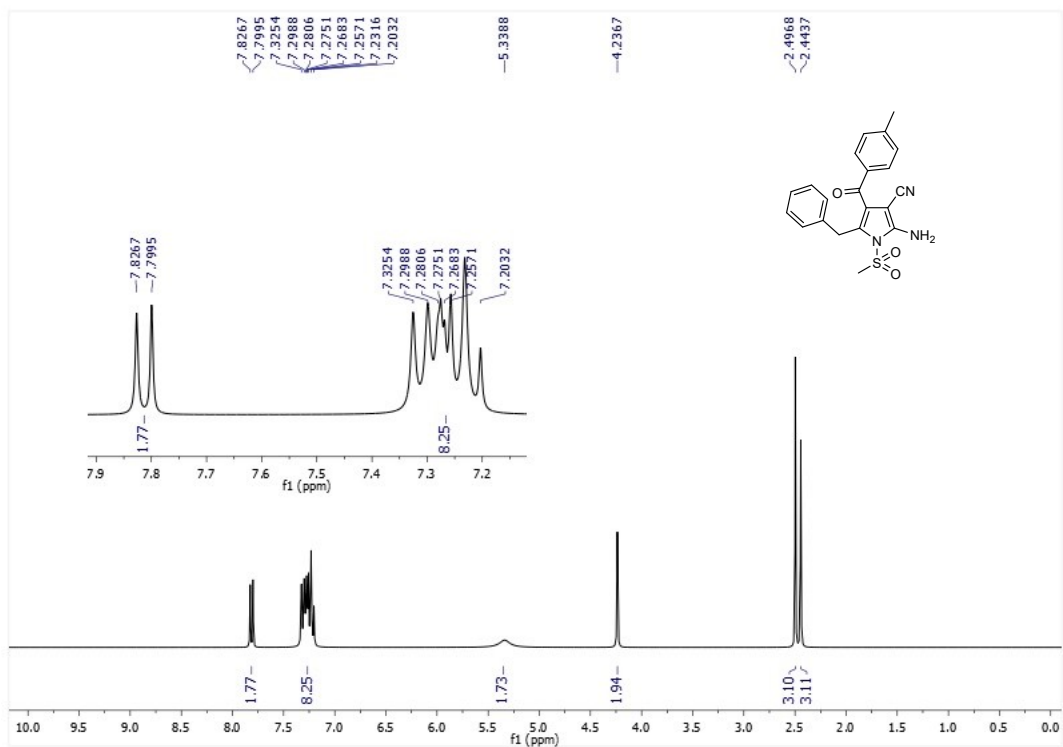

$^1\text{H NMR}$  (300 MHz) of Compound **4v** in  $\text{CDCl}_3$

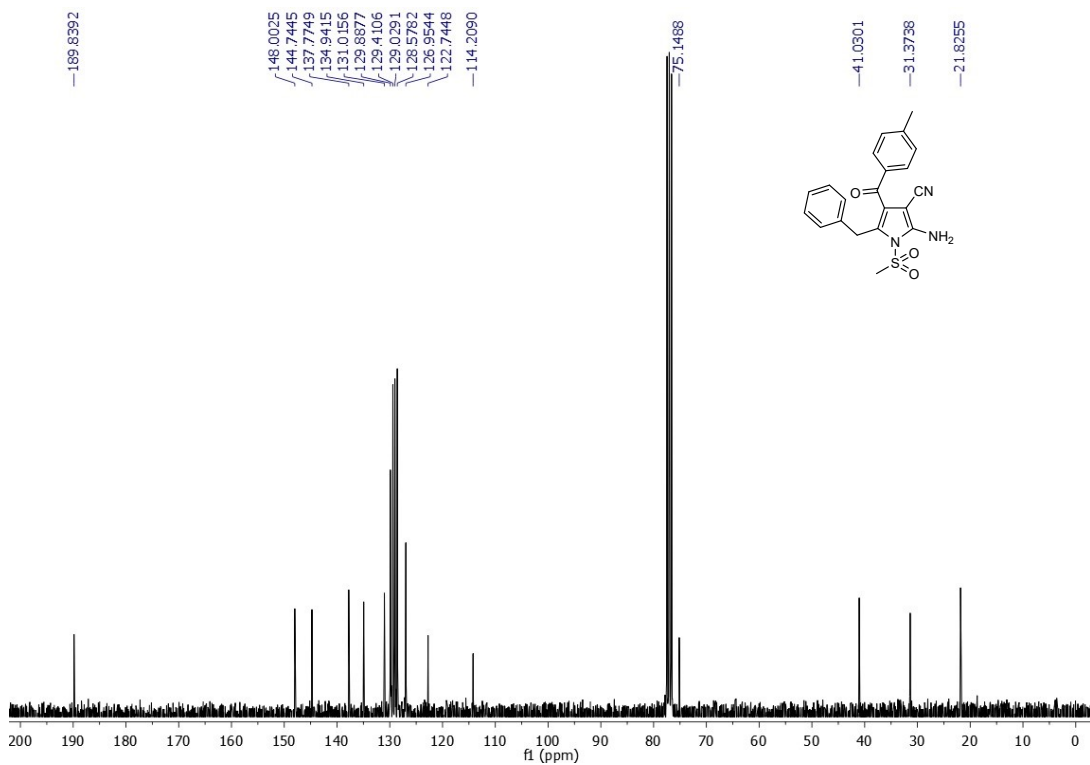

$^{13}\text{C NMR}$  (75 MHz) of Compound **4v** in  $\text{CDCl}_3$

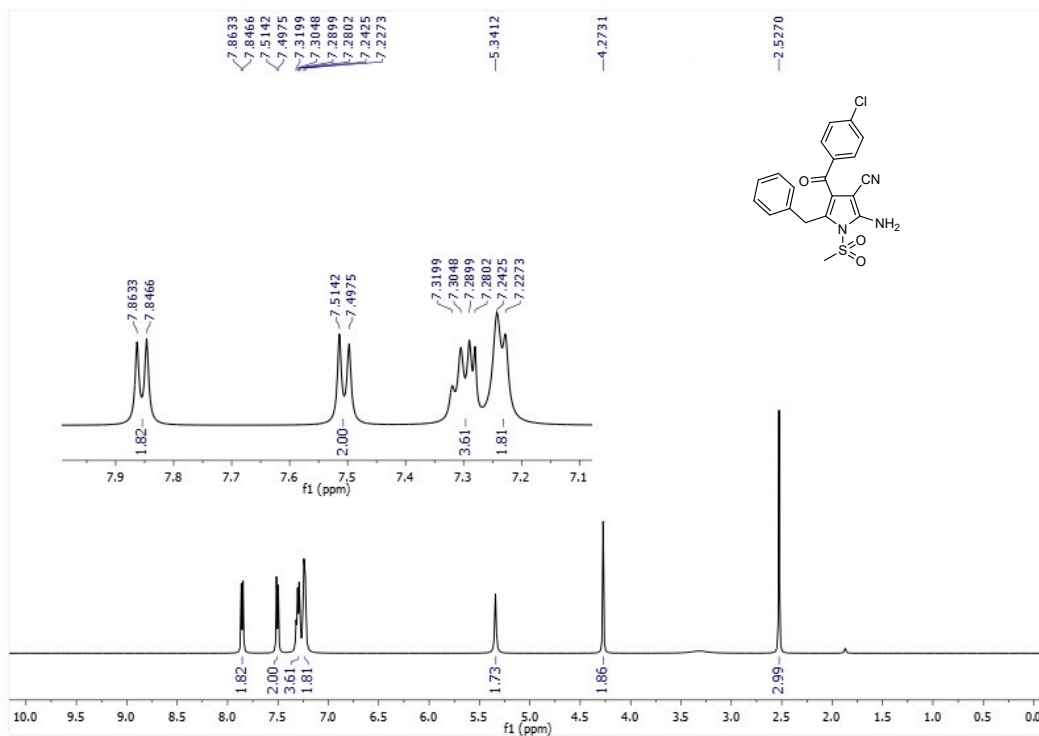

$^1\text{H}$  NMR (500 MHz) of Compound **4w** in  $\text{CDCl}_3$

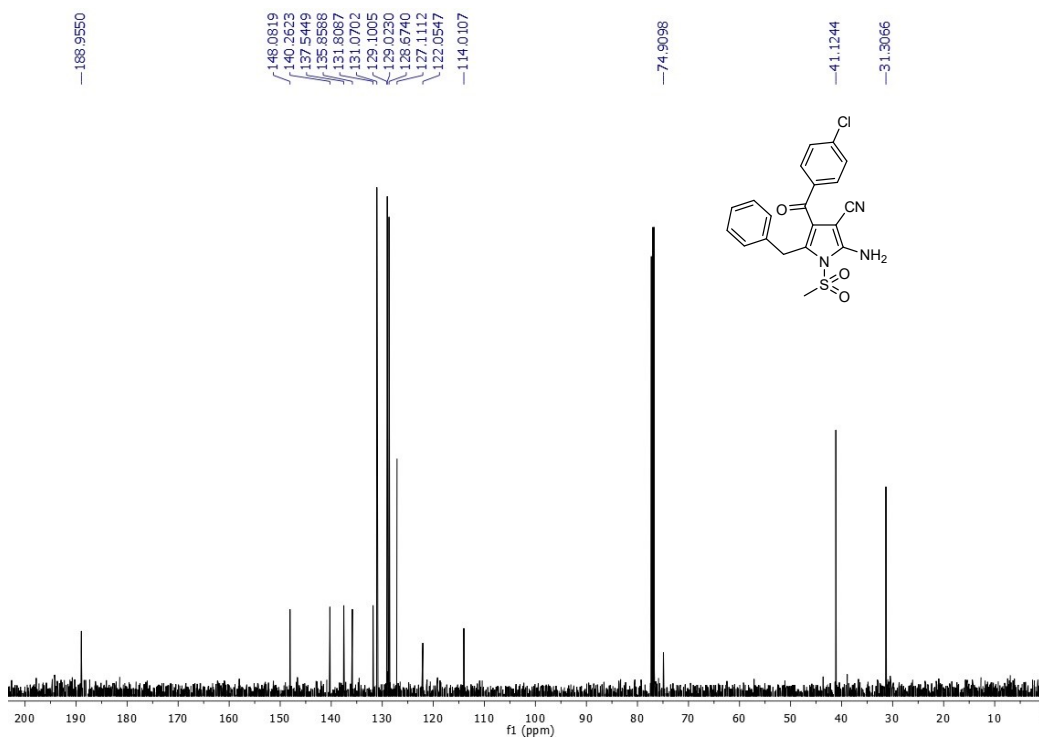

$^{13}\text{C}$  NMR (126 MHz) of Compound **4w** in  $\text{CDCl}_3$



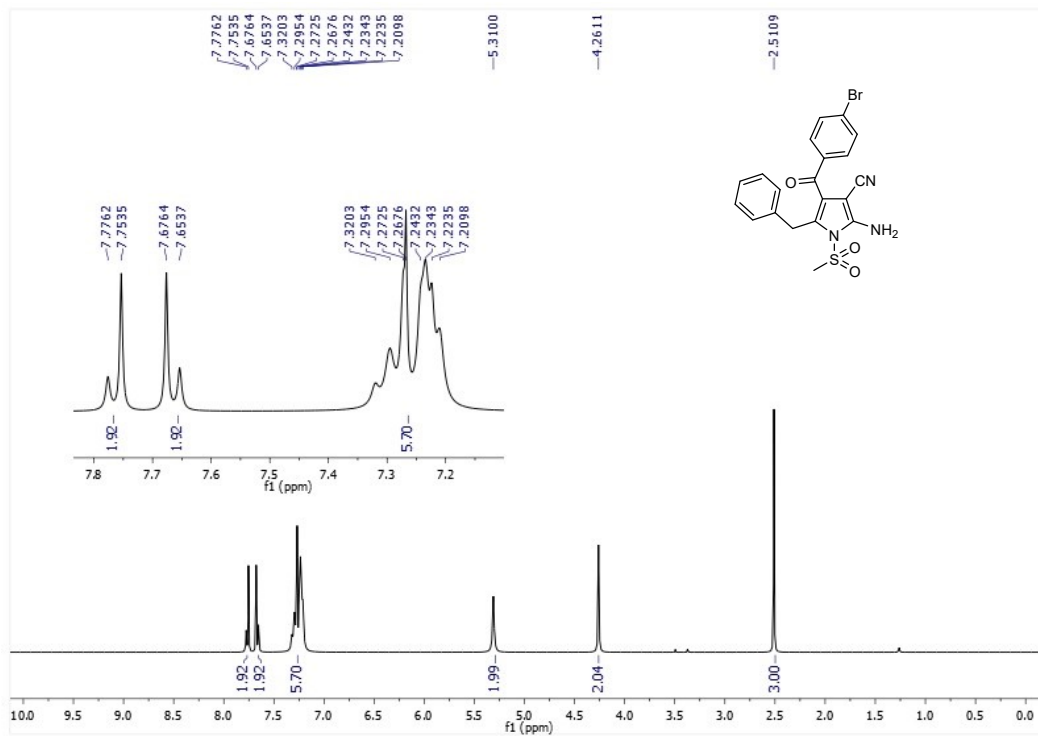

<sup>1</sup>H NMR (300 MHz) of Compound 4x in CDCl<sub>3</sub>

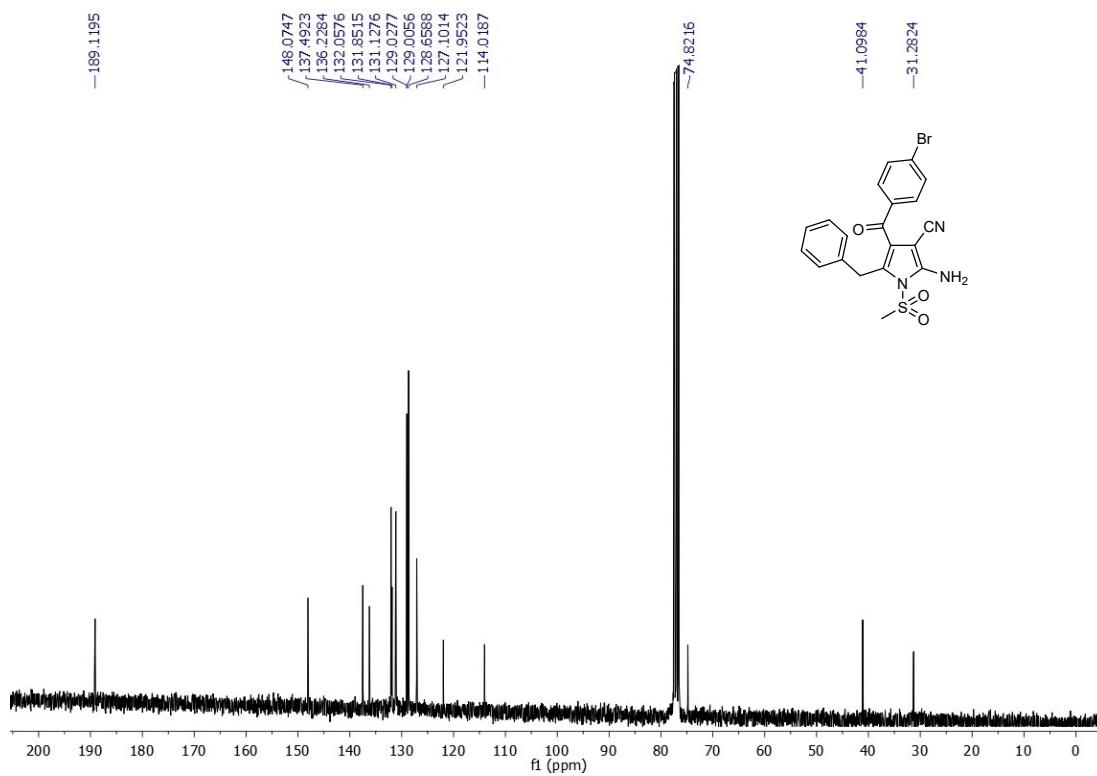

<sup>13</sup>C NMR (75 MHz) of Compound 4x in CDCl<sub>3</sub>

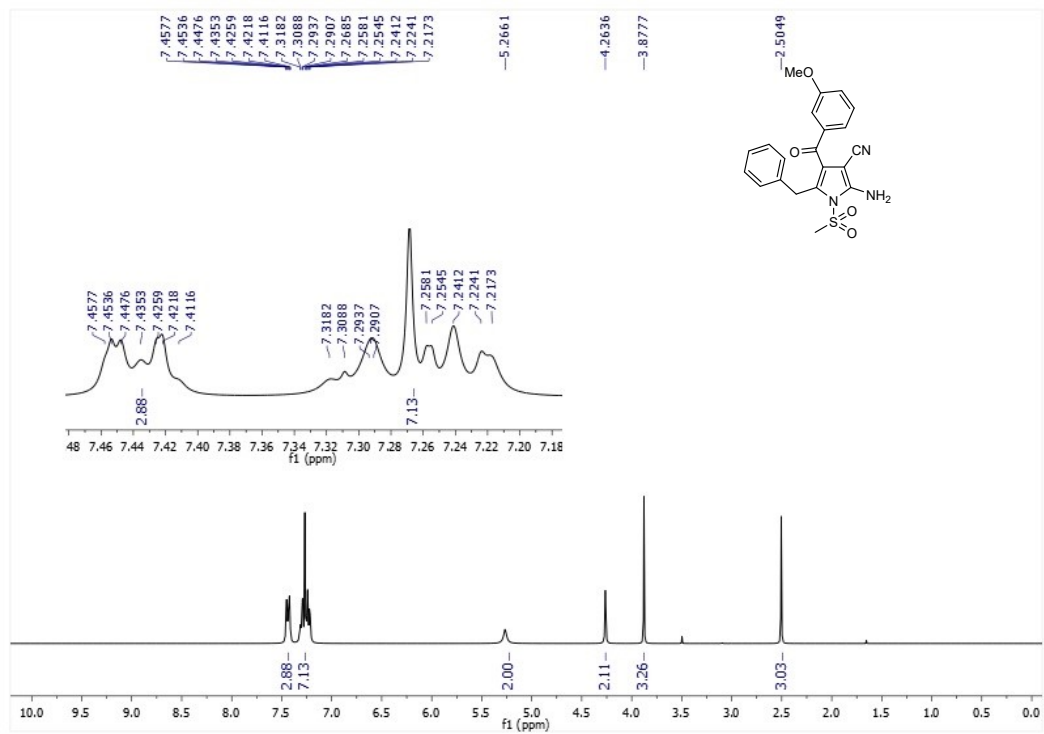

**<sup>1</sup>H NMR (300 MHz) of Compound 4y in CDCl<sub>3</sub>**

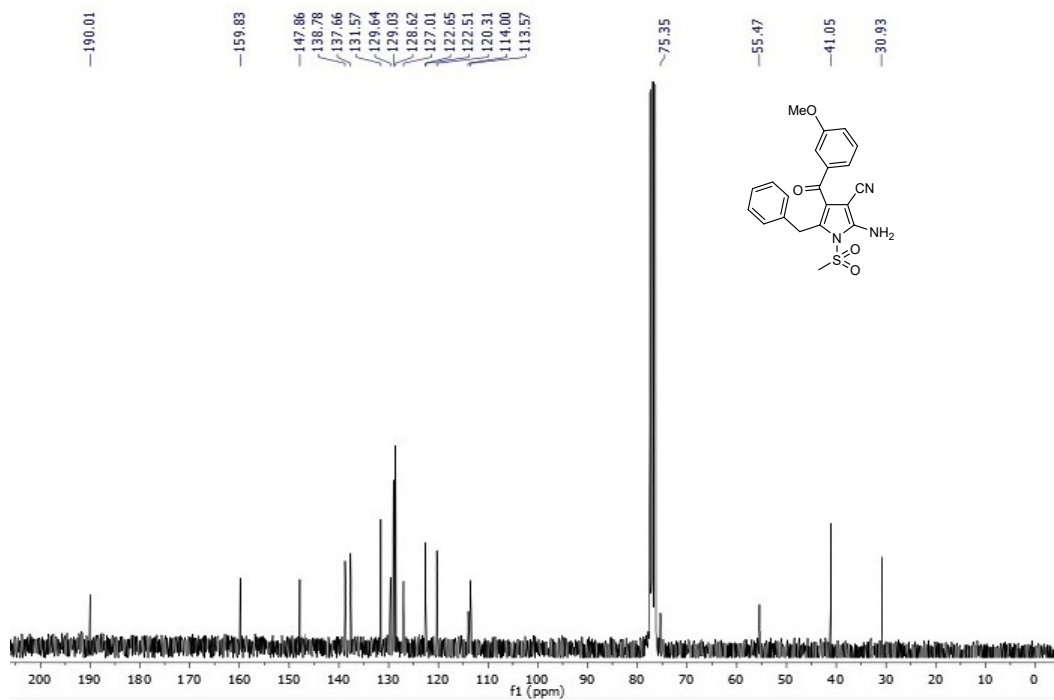

**<sup>13</sup>C NMR (75 MHz) of Compound 4y in CDCl<sub>3</sub>**

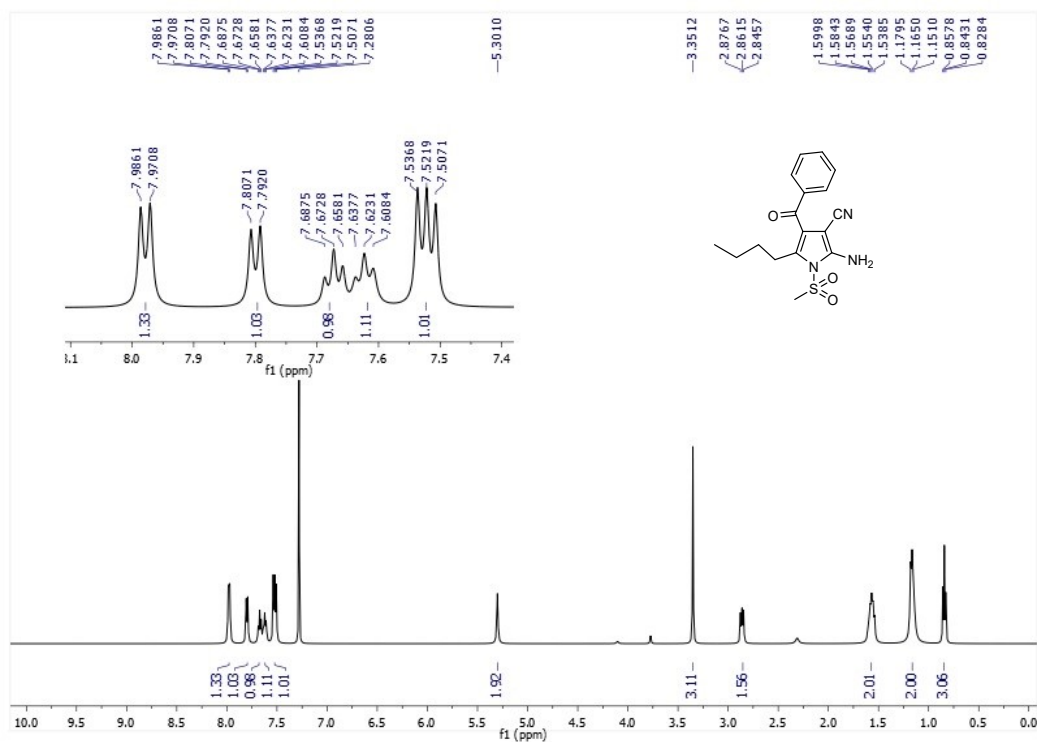

<sup>1</sup>H NMR (500 MHz) of Compound 4z in CDCl<sub>3</sub>

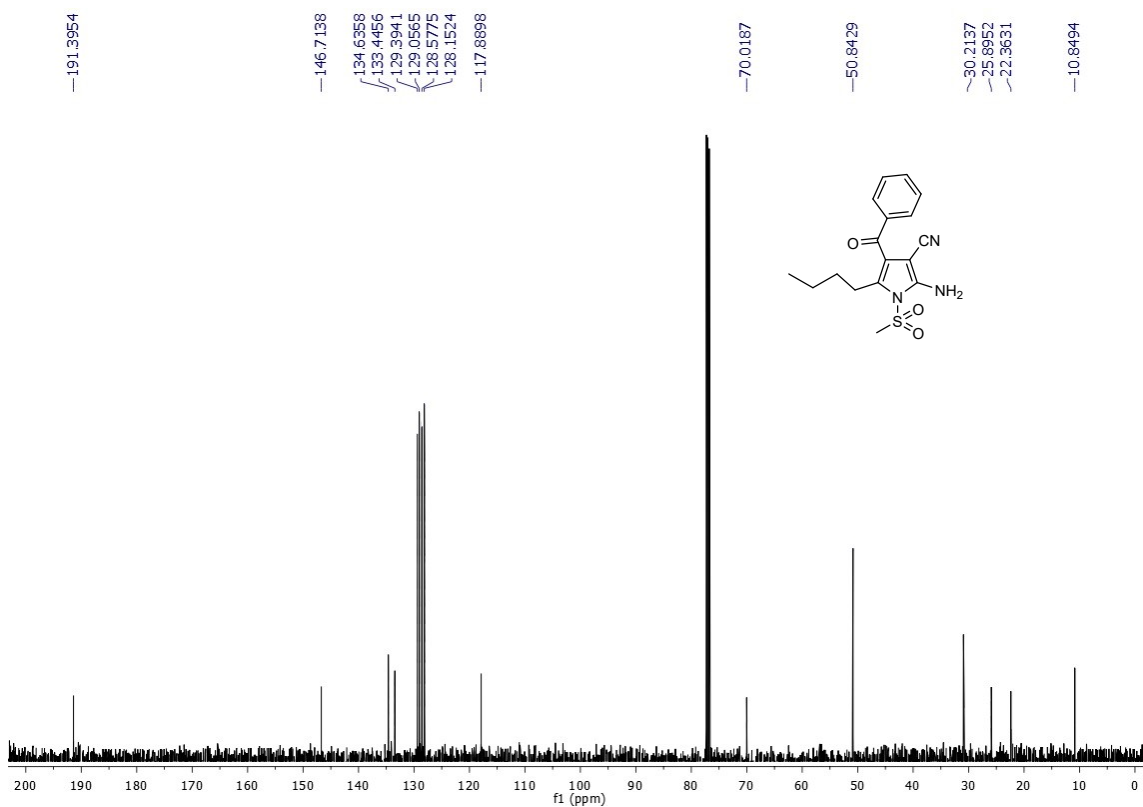

<sup>13</sup>C NMR (126 MHz) of Compound 4z in CDCl<sub>3</sub>

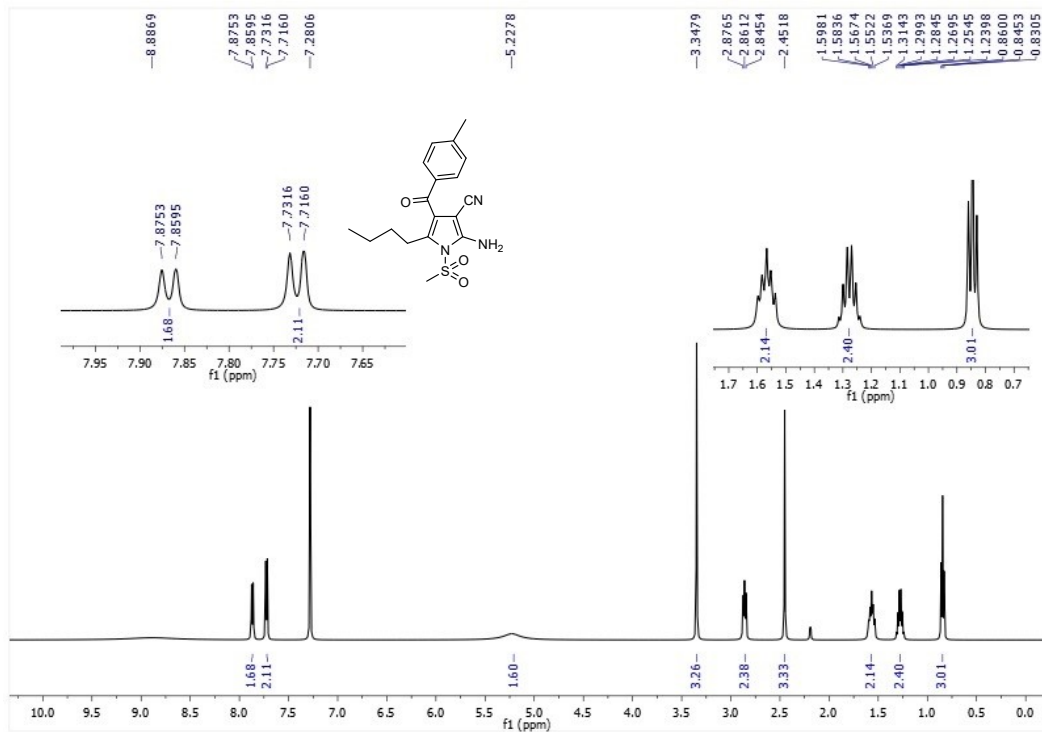

**<sup>1</sup>H NMR (500 MHz) of Compound 4aa in CDCl<sub>3</sub>**

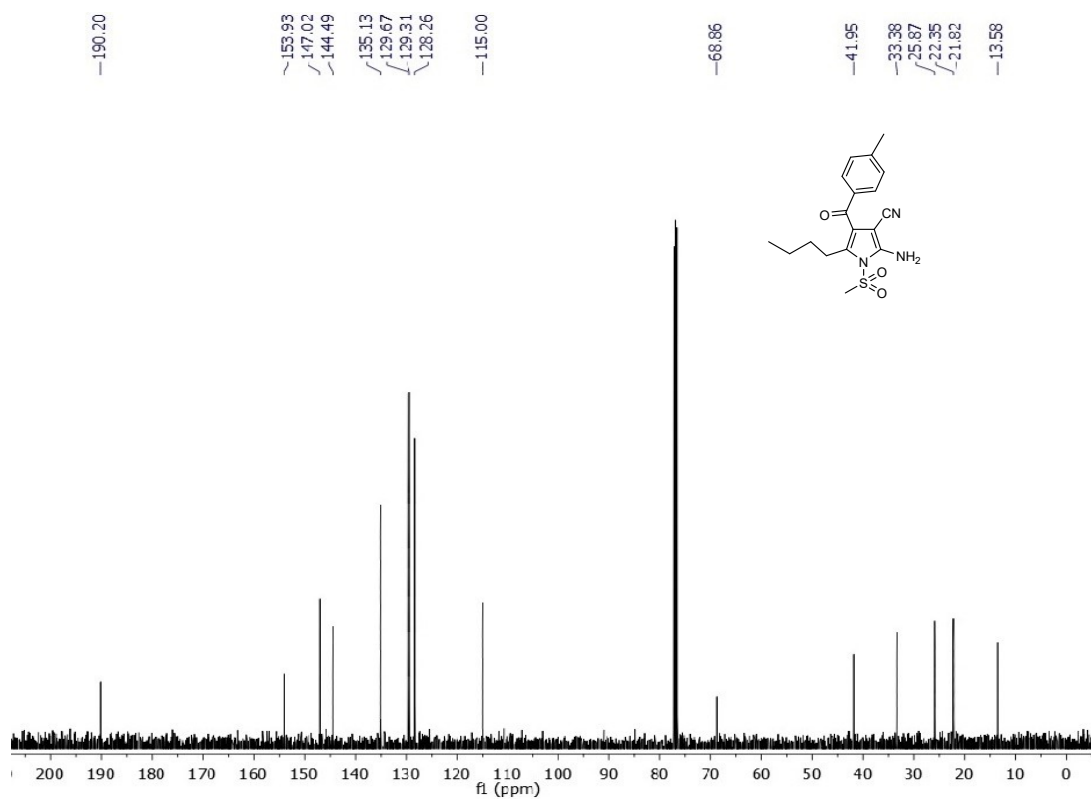

**<sup>13</sup>C NMR (126 MHz) of Compound 4aa in CDCl<sub>3</sub>**

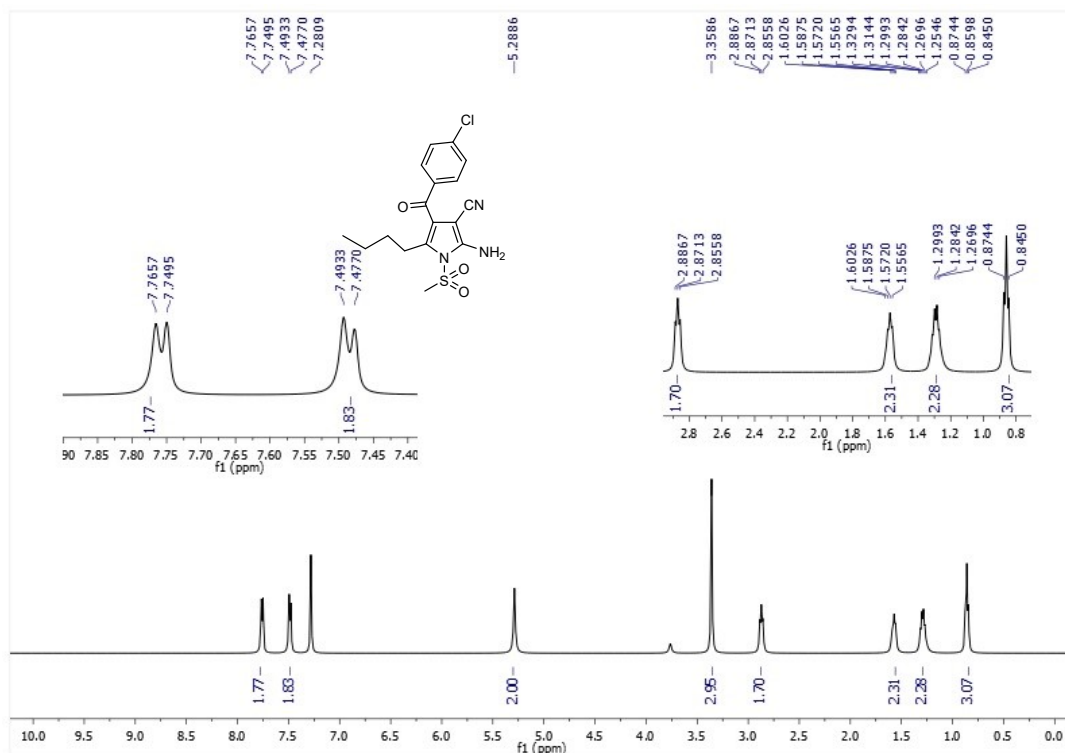

<sup>1</sup>H NMR (500 MHz) of Compound 4ab in CDCl<sub>3</sub>

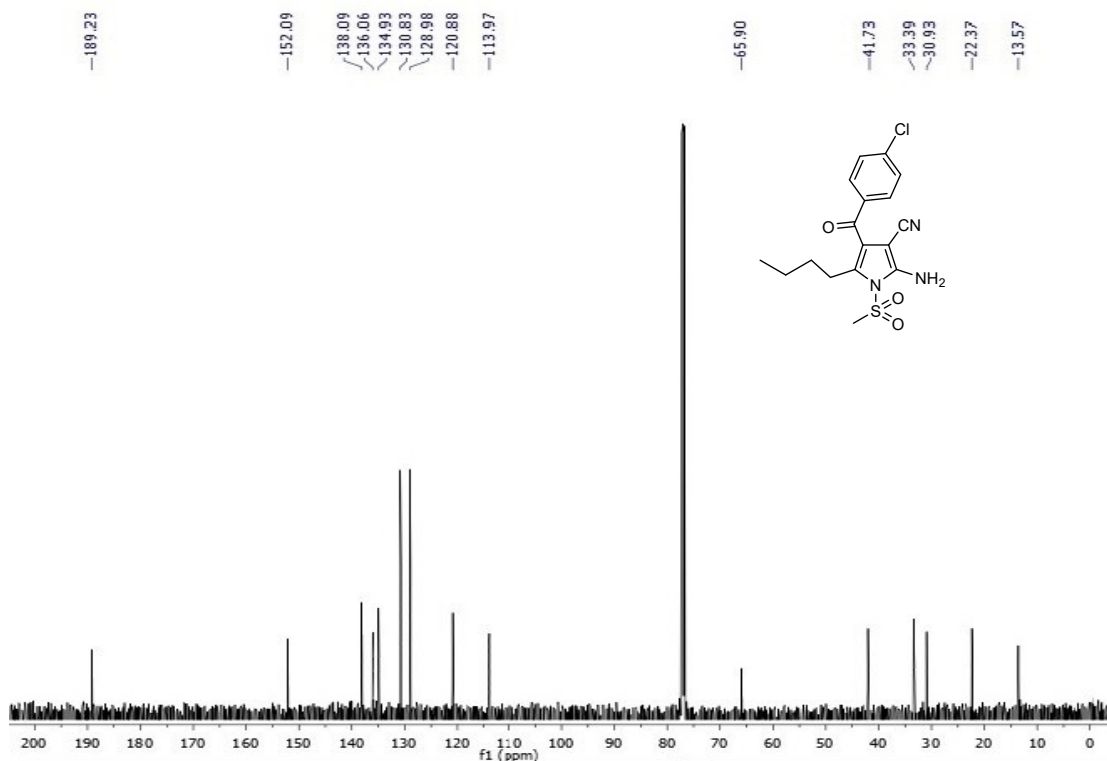

<sup>13</sup>C NMR (126 MHz) of Compound 4ab in CDCl<sub>3</sub>

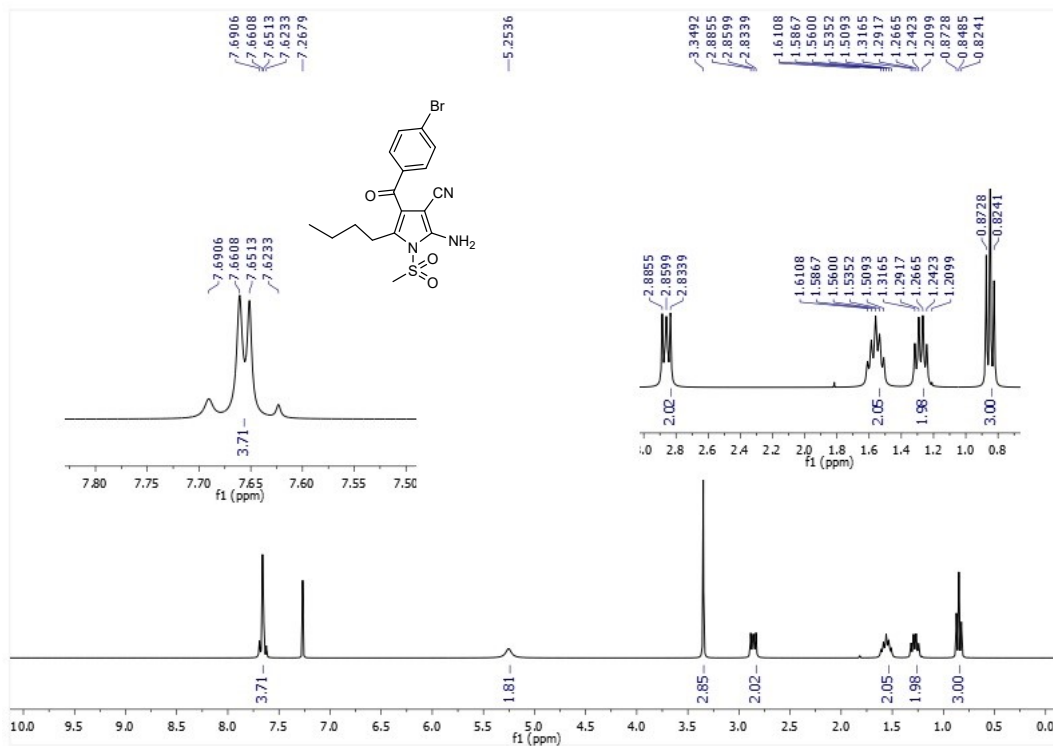

**<sup>1</sup>H NMR (300 MHz) of Compound 4ac in CDCl<sub>3</sub>**

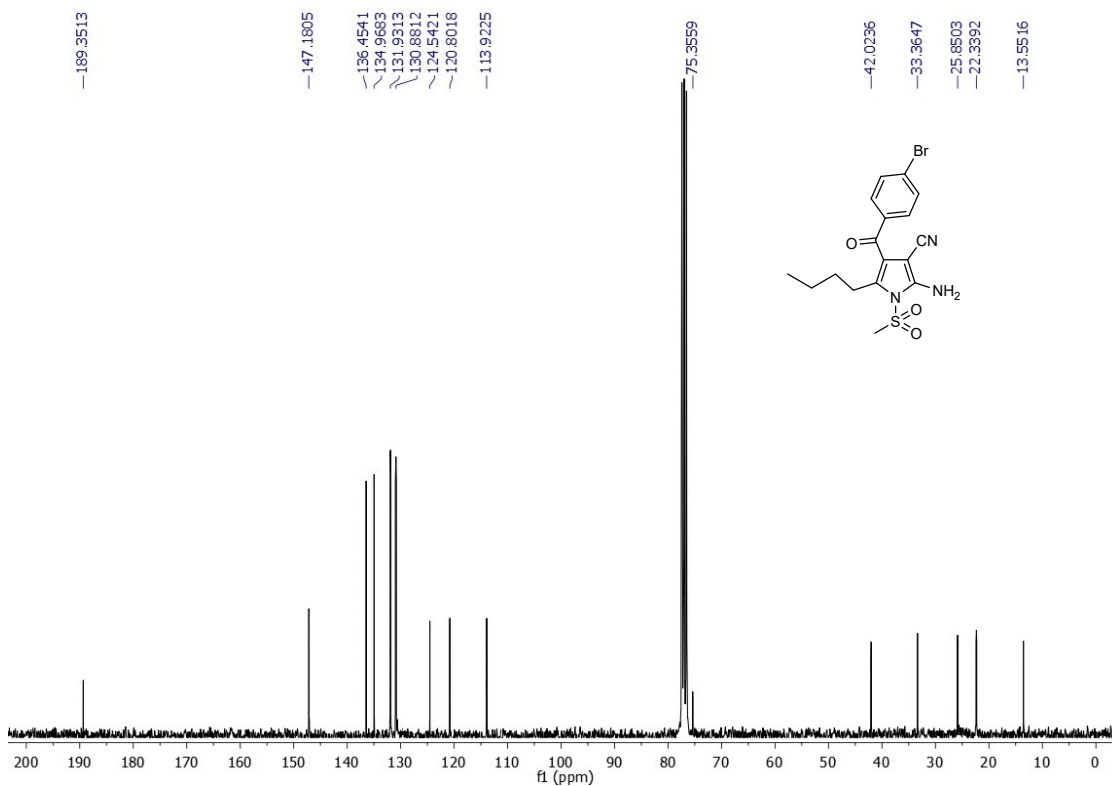

**<sup>13</sup>C NMR (75 MHz) of Compound 4ac in CDCl<sub>3</sub>**

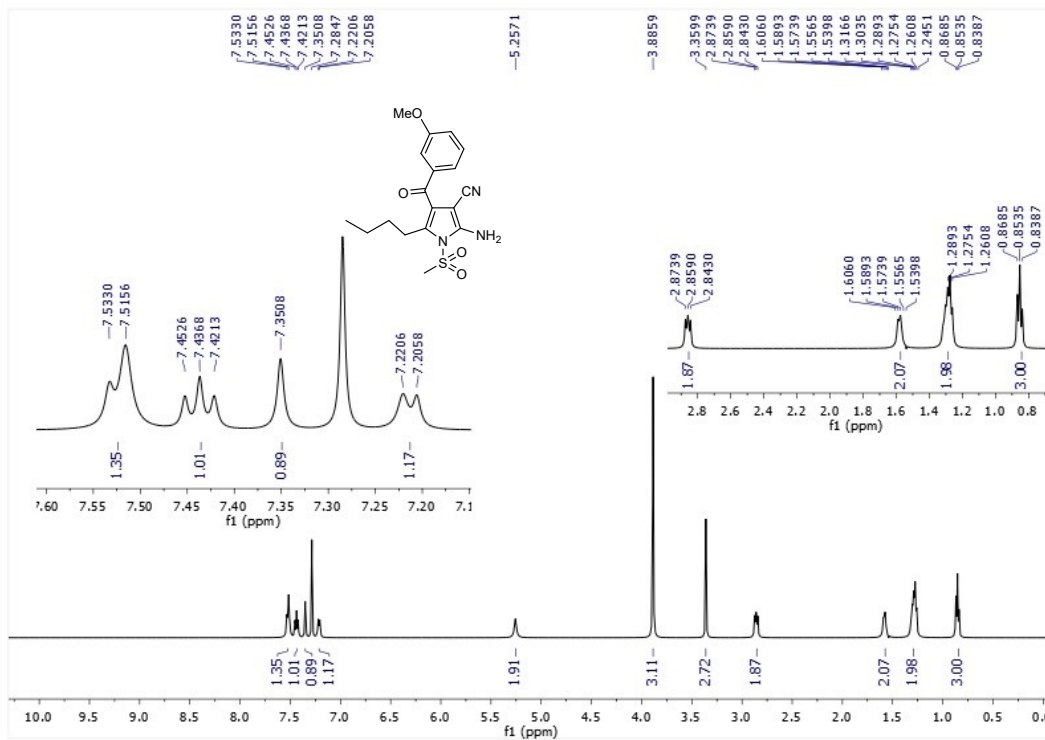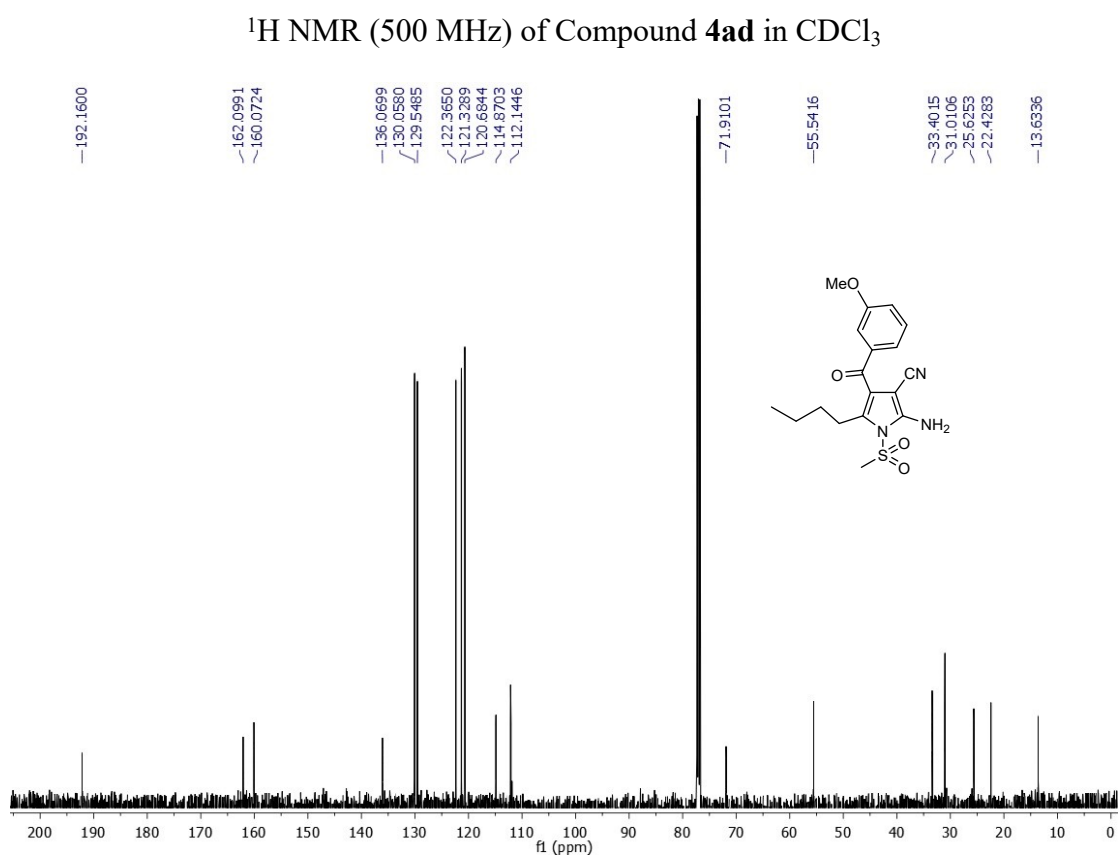

## X-ray crystal-structure determination of compound **41**

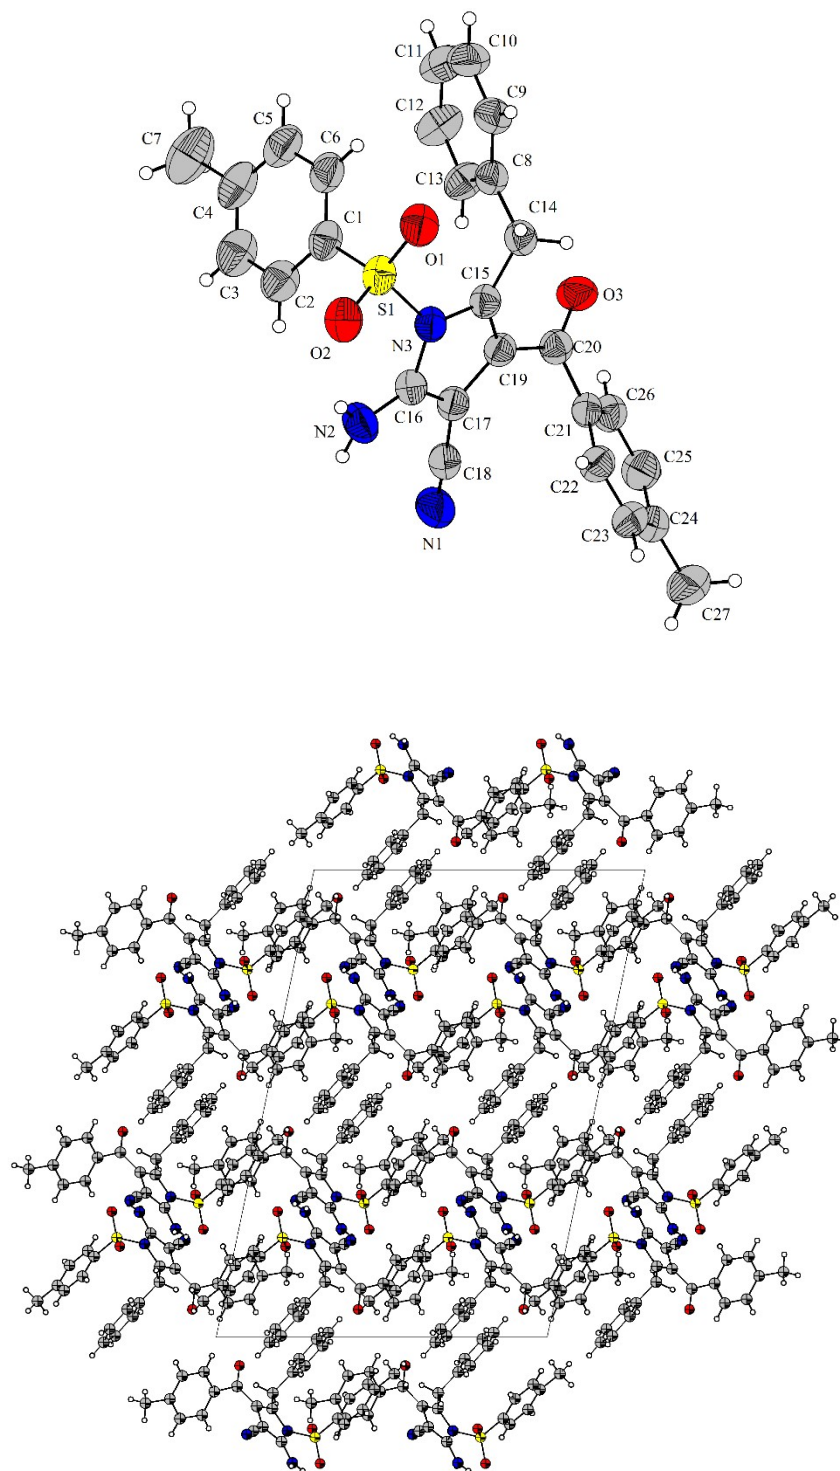

**Figure S1.** X-ray crystal-structure determination of compound **41**. The ellipsoid contour probability levels are 50%. CCDC 2132591 (**41**) contains the supplementary crystallographic data for this paper. The data can be obtained free of charge from The Cambridge Crystallographic Data Centre *via* [www.ccdc.cam.ac.uk/getstructures](http://www.ccdc.cam.ac.uk/getstructures).



**Table S1.** Experimental details of Crystal data

|                                    |                                                                |
|------------------------------------|----------------------------------------------------------------|
| <b>Chemical formula</b>            | <b>C<sub>27</sub>H<sub>23</sub>N<sub>3</sub>O<sub>3</sub>S</b> |
| <i>Mr</i>                          | 469.54                                                         |
| Crystal system, space group        | Monoclinic, <i>I12/c1</i>                                      |
| Temperature (K)                    | 290                                                            |
| <i>a</i> , <i>b</i> , <i>c</i> (Å) | 17.402 (4), 11.109 (2), 25.127 (10)Å                           |
| $\beta$ (°)                        | 101.82 (3)                                                     |
| <i>V</i> (Å <sup>3</sup> )         | 4755 (2)                                                       |
| <i>Z</i>                           | 4                                                              |
| Radiation type                     | Mo <i>K</i> $\alpha$                                           |
| $\mu$ (mm <sup>-1</sup> )          | 0.17 mm <sup>-1</sup>                                          |
| Crystal size (mm)                  | 0.4 × 0.3 × 0.25 mm                                            |

**Data collection**

|                                                                                             |                        |
|---------------------------------------------------------------------------------------------|------------------------|
| Diffractometer                                                                              | MAR345                 |
| <i>h</i> , <i>k</i> , <i>l</i>                                                              | -13→13, -20→20, -19→20 |
| <i>T</i> <sub>min</sub> , <i>T</i> <sub>max</sub>                                           | 0.969, 1.047           |
| No. of measured, independent and observed [ <i>I</i> > 2 $\sigma$ ( <i>I</i> )] reflections | 13895, 4626, 4117      |
| <i>R</i> <sub>int</sub>                                                                     | 0.098                  |
| $\theta$ <sub>max</sub> , $\theta$ <sub>min</sub>                                           | 25.0°, 2.1°            |

**Refinement**

|                                                                                                                         |                                                                        |
|-------------------------------------------------------------------------------------------------------------------------|------------------------------------------------------------------------|
| <i>R</i> [ <i>F</i> <sup>2</sup> > 2 $\sigma$ ( <i>F</i> <sup>2</sup> )], <i>wR</i> ( <i>F</i> <sup>2</sup> ), <i>S</i> | 0.051, 0.132, 1.09                                                     |
| No. of reflections                                                                                                      | 4626                                                                   |
| No. of parameters                                                                                                       | 318                                                                    |
| No. of restraints                                                                                                       | 1                                                                      |
| H-atom treatment                                                                                                        | H atoms treated by a mixture of independent and constrained refinement |
| $\Delta\rho$ <sub>max</sub> , $\Delta\rho$ <sub>min</sub> (e Å <sup>-3</sup> )                                          | 0.24, -0.31                                                            |

Computer programs: MAR345 dtb Program (1.24-4, 2013), Automar software package (3.3a, 2015), *SHELXT* 2018/2 (Sheldrick, 2018), *SHELXL2016/6* (Sheldrick, 2016), *DIAMOND* (Brandenburg, 1999), *PLATON* (2018).

## References

Sheldrick, G. M. (2015). *Acta Cryst. A* 71, 3-8.

Sheldrick, G. M. (2015). *Acta Cryst. C* 71, 3-8.
